# Supplementary material for: Connexin 43 hemichannels regulate mitochondrial ATP generation, mobilization, and mitochondrial homeostasis against oxidative stress
Source: eLife. 2022 Nov 8;11:e82206. doi: 10.7554/eLife.82206 (PMC9642995; doi:10.7554/eLife.82206)
Supplement: Figure 1—figure supplement 1—source data 2. [file elife-82206-fig1-figsupp1-data2.xlsx]

## Sheet: Figure 1-figure supplement 1C
Count/Area		Mito	ER	Hochest
		1526	162	17
		1880	205	10
		1774	216	3
		2047	187	19
