# Supplementary material for: Connexin 43 hemichannels regulate mitochondrial ATP generation, mobilization, and mitochondrial homeostasis against oxidative stress
Source: eLife. 2022 Nov 8;11:e82206. doi: 10.7554/eLife.82206 (PMC9642995; doi:10.7554/eLife.82206)
Supplement: Figure 1—figure supplement 2—source data 1. [file elife-82206-fig1-figsupp2-data1.xlsx]

## Sheet: Figure 1-figure supplement 2B
MC3T3-E1 colocalization		Ctrl	H2O2
		0.481	0.537
		0.499	0.567
		0.476	0.521
		0.505	0.588
