# Supplementary material for: Connexin 43 hemichannels regulate mitochondrial ATP generation, mobilization, and mitochondrial homeostasis against oxidative stress
Source: eLife. 2022 Nov 8;11:e82206. doi: 10.7554/eLife.82206 (PMC9642995; doi:10.7554/eLife.82206)
Supplement: Figure 1—source data 1. [file elife-82206-fig1-data1.xlsx]

## Sheet: Cx43 translocation
SDHA and Cx43 colocalization				WB quantification
	Ctrl	H2O2			0	1	2	3	4	hrs
	0.381	0.433			1.05287	1.64838	1.79936	2.76031	1.31061
	0.352	0.446			1.15343	1.99286	2.1182	2.60826	1.95217
	0.347	0.458			0.835978	1.06139	1.75512	3.12412	2.73751
	0.331	0.527			1.03721	1.53844	2.06028	2.26417	1.77154
					0.920518	1.01265	2.33011	3.33652
