# Supplementary material for: Connexin 43 hemichannels regulate mitochondrial ATP generation, mobilization, and mitochondrial homeostasis against oxidative stress
Source: eLife. 2022 Nov 8;11:e82206. doi: 10.7554/eLife.82206 (PMC9642995; doi:10.7554/eLife.82206)
Supplement: Figure 1—source data 3. [file elife-82206-fig1-data3.xlsx]

## Sheet: 1F Dyeuptake
	Veh				IgG			E2			CT						CBX
Ctrl	0.478495	0.357312	0.561704	0.307803	0.466512	0.482856	0.508052	0.487038	0.365478	0.594747	0.51146	0.323154	0.365937	0.530732			0.449828	0.440379	0.362939	0.38058
H2O2	0.565154	0.530174	0.65786		0.536134	0.545586	0.652681	0.487591	0.492058	0.583517	0.476065	0.436077	0.330702	0.410985	0.401719	0.424779	0.518625	0.341055	0.398571	0.397793	0.3792
