# Supplementary material for: Connexin 43 hemichannels regulate mitochondrial ATP generation, mobilization, and mitochondrial homeostasis against oxidative stress
Source: eLife. 2022 Nov 8;11:e82206. doi: 10.7554/eLife.82206 (PMC9642995; doi:10.7554/eLife.82206)
Supplement: Figure 2—source data 2. — Raw data of dye uptake for Figure 2D. [file elife-82206-fig2-data2.xlsx]

## Sheet: Sheet 1
	WB quantification
	Membrane prep	Ctrl	CxKD	Mito	Ctrl	CxKD
		1.57286	0.35793		1.26071	0.109545
		1.61292	0.077997		0.955276	0.447486
		1.55625	0.725912		1.08828	0.170856
	Dyeuptake
		Ctrl			CxKD
	CTRL	0.473982	0.531918	0.510894	0.33863	0.419968	0.360527
	H2O2	0.656022	0.752914	0.734981	0.273383	0.508283	0.394028
