# Supplementary material for: Connexin 43 hemichannels regulate mitochondrial ATP generation, mobilization, and mitochondrial homeostasis against oxidative stress
Source: eLife. 2022 Nov 8;11:e82206. doi: 10.7554/eLife.82206 (PMC9642995; doi:10.7554/eLife.82206)
Supplement: Figure 2—source data 3. — Raw data for reactive oxygen species (ROS) generation in Figure 2G&H. [file elife-82206-fig2-data3.xlsx]

## Sheet: TMRE & ROS staining 
TMRE					mitoSOX										DCF
	Ctrl	CxKD				Ctrl				CxKD						Ctrl					CxKD
	26.476	22.733			DMSO	19.683	19.8384	19.723	19.932	17.4435	16.3045	17.266	17.075		DMSO	7.942	8.249	8.041	8.445	8.803	6.869	7.806	7.188	7.562	6.909
	37.15	21.679			AA	26.6904	25.3949	25.193	25.347	21.1007	23.8338	23.443	21.478		AA	7.978	8.592	8.188	8.225	9.116	7.637	7.206	8.608	7.946	8.071
	39.286	25.1			Rot	25.7366	26.0638	26.167	26.275	23.6664	23.4752	24.786	25.023		Rot	9.531	9.804	9.544	8.946	8.866	7.283	8.963	7.882	8.772	6.008
	23.375	36.875			AA+Rot	36.7457	34.8264	34.472	36.115	35.1401	33.4399	33.256	34.556		AA+Rot	9.108	9.934	9.237	9.791	10.04	8.686	8.324	7.447	9.01	8.615
	21.545	23.094
	29	25.091
	34.538	17.375
	43.5	24.929
	30.55	24.071
	34.3	16.095
	24.261	16.217
	26.562	16.905
	35.357	28.909
	19.286	21.429
	22.692	25.273
