# Supplementary material for: Connexin 43 hemichannels regulate mitochondrial ATP generation, mobilization, and mitochondrial homeostasis against oxidative stress
Source: eLife. 2022 Nov 8;11:e82206. doi: 10.7554/eLife.82206 (PMC9642995; doi:10.7554/eLife.82206)
Supplement: Figure 3—source data 1. [file elife-82206-fig3-data1.xlsx]

## Sheet: OCR data
Time (minutes)	Ctrl																	CxKD
1.41145	62.4672	64.5178	85.0119	69.2251	46.2605	69.8697	63.082	65.737	67.8254	64.2044	47.5899	54.2302	54.4479	42.2019	76.3071	72.9243	36.8972	54.1742	49.9685	35.8513	62.925	58.889	75.586	37.7584	57.4379	38.2375	43.5595	58.2352	24.3011	19.2059	18.3896
5.94954	59.1528	61.122	82.8776	71.2467	53.3175	66.8692	62.6452	59.6219	64.405	69.4577	53.1021	51.477	53.2678	42.4689	69.7952	71.7043	47.1274	53.8943	44.5216	38.467	55.5747	57.5534	63.5	37.9803	63.2057	36.7	34.6275	55.514	30.8681	23.7056	38.9272
10.5823	140.991	166.853	178.912	183.536	147.17	159.555	179.427	145.103	161.86	168.044	135.904	147.453	175.138	133.918	180.239	137.72	66.4612	140.804	126.701	137.368	93.0707	133.88	117.412	101.585	71.1372	100.171	84.01	65.4286	100.766	72.6472	112.438
15.1264	132.671	159.984	173.072	179.168	127.416	154.464	174.616	141.139	155.454	164.742	140.634	142.229	169.004	128.856	159.09	138.2	79.799	132.792	123.282	120.964	94.3497	119.736	108.12	93.7514	58.8329	90.3463	78.7147	66.6966	93.632	66.802	108.019
19.7558	36.1968	52.7889	60.9463	113.645	44.3532	34.7498	49.0782	36.9675	40.9245	47.1732	35.8695	37.4429	42.8306	37.4475	35.9099	101.63	16.2109	35.4169	28.2218	26.776	31.105	52.1655	48.1512	28.0034	52.3151	12.4908	22.5237	26.2729	22.1025	35.3237	68.8667
24.2968	35.196	53.484	57.2975	116.315	40.9122	36.7658	52.2732	38.9458	40.8938	45.1726	36.8342	38.9335	38.557	38.2658	39.7806	97.8333	19.7082	34.3483	28.1741	28.7567	26.5491	55.5985	45.1028	28.3828	53.8527	8.79793	25.3365	31.5894	19.6916	38.991	67.9618
28.9173	91.3451	118.961	131.206	121.198	91.6234	93.3707	135.165	98.5302	123.192	122.1	106.894	106.905	117.339	92.5554	116.647	106.286	80.7939	86.0181	79.2774	80.5968	67.3668	30.6253	76.3239	67.9301	70.0173	25.1757	70.2319	83.0514	62.013	66.5431	72.721
33.4602	85.5371	106.72	118.546	115.13	83.3665	88.2306	119.577	88.4665	106.027	111.841	103.793	97.4534	107.938	79.0425	114.111	92.8548	47.5709	75.8323	69.3287	75.4369	61.8039	31.0774	73.0611	58.7348	67.5465	27.3642	63.3432	77.6366	54.9703	57.2692	66.6003
38.0965	17.8122	20.8298	33.8154	43.6203	20.1227	12.7364	33.8351	12.6528	9.20684	18.7238	10.586	16.5324	14.9104	8.52661	81.8274	20.4184	34.3032	16.314	39.4191	44.4621	15.2018	11.6153	30.2978	22.7406	20.2805	6.5691	15.3767	12.6223	10.7113	9.44178	21.0006
42.6401	16.9457	23.1596	28.8458	40.7187	17.867	15.7842	31.377	13.1798	10.0524	19.2543	12.2282	15.404	14.88	7.23974	67.3736	23.1704	31.0097	15.6336	34.7323	39.9963	15.9923	12.344	31.8255	19.62	22.3176	6.69429	14.2089	17.5138	7.84224	11.1679	24.9075
47.182	14.7542	20.5604	26.4332	38.0256	13.8993	14.8052	32.5919	7.51832	6.95388	15.8635	5.91679	14.2254	14.2026	7.19928	49.7541	15.2566	29.4115	12.9438	26.8845	31.3563	9.54857	10.3149	31.2435	17.1881	18.4592	1.28686	11.7474	13.7293	8.455	6.38453	23.5165
	Ctrl																	CxKD
State 2	62.4672	64.5178	85.0119	69.2251	46.2605	69.8697	63.082	65.737	67.8254	64.2044	47.5899	54.2302	54.4479	42.2019	76.3071	72.9243	36.8972	54.1742	49.9685	35.8513	62.925	58.889	75.586	37.7584	57.4379	38.2375	43.5595	58.2352	24.3011	19.2059	18.3896
State 3	140.991	166.853	178.912	183.536	147.17	159.555	179.427	145.103	161.86	168.044	135.904	147.453	175.138	133.918	180.239	137.72	66.4612	140.804	126.701	137.368	93.0707	133.88	117.412	101.585	71.1372	100.171	84.01	65.4286	100.766	72.6472	112.438
State 4o	36.1968	52.7889	60.9463	113.645	44.3532	34.7498	49.0782	36.9675	40.9245	47.1732	35.8695	37.4429	42.8306	37.4475	35.9099	101.63	16.2109	35.4169	28.2218	26.776	31.105	52.1655	48.1512	28.0034	52.3151	12.4908	22.5237	26.2729	22.1025	35.3237	68.8667
State 3u	91.3451	118.961	131.206	121.198	91.6234	93.3707	135.165	98.5302	123.192	122.1	106.894	106.905	117.339	92.5554	116.647	106.286	80.7939	86.0181	79.2774	80.5968	67.3668	30.6253	76.3239	67.9301	70.0173	25.1757	70.2319	83.0514	62.013	66.5431	72.721
	Basal ATP			ATP			Proton leak
	Ctrl	CxKD		Ctrl	CxKD		Ctrl	CxKD
	42.2071	38.2606		81.8386	86.9102		19.2511	19.7833
	37.9624	9.7893		105.731	82.1798		29.6293	15.1126
	54.0318	39.5824		96.0349	98.9008		32.1005	16.3257
	30.528	45.2095		112.289	37.496		26.4862	8.38341
	35.4505	31.6745		93.8528	76.3263		18.9656	29.9975
	51.085	18.3604		92.6857	53.9116		17.7012	5.79653
	31.2682	40.8881		116.782	63.6042		23.7877	8.31479
	46.4421	30.0057		85.4807	7.93151		30.8721	8.75908
	54.3526	20.4186		97.4552	63.4711		27.9189	14.2602
	50.2034	38.0002		98.5864	49.3825		23.6413	24.1558
	40.8739	23.0259		19.3339	9.91464		22.039	6.53955
	36.073	12.5376		82.8016	69.8979		27.9506
	38.3878	14.0197		95.9764	48.9416		30.2077
	35.2292			121.87	73.5109
	48.5339			91.4491
	16.1177			110.444
				66.0158
