# Supplementary material for: Connexin 43 hemichannels regulate mitochondrial ATP generation, mobilization, and mitochondrial homeostasis against oxidative stress
Source: eLife. 2022 Nov 8;11:e82206. doi: 10.7554/eLife.82206 (PMC9642995; doi:10.7554/eLife.82206)
Supplement: Figure 3—source data 2. [file elife-82206-fig3-data2.xlsx]

## Sheet: ATP quantification
	Whole cell lysis			Cytosol			Mitochondria
Ctrl	14.156	8.94156	10.2261	79.8178	93.427	72.5661	3.42947	3.02026	2.45828
Cx43 KD	2.16148	2.35002	1.73085	14.7673	13.8473	15.4955	0.14292	0.047868	0.138803
