# Supplementary material for: Connexin 43 hemichannels regulate mitochondrial ATP generation, mobilization, and mitochondrial homeostasis against oxidative stress
Source: eLife. 2022 Nov 8;11:e82206. doi: 10.7554/eLife.82206 (PMC9642995; doi:10.7554/eLife.82206)
Supplement: Figure 3—source data 3. [file elife-82206-fig3-data3.xlsx]

## Sheet: qPCR
Sdha			Atp5mf			Slc25a5
	Ctrl	CxKD		Ctrl	CxKD		Ctrl	CxKD
	0.05625	0.042896		0.493458	0.421908		0.075311	0.142991
	0.094805	0.046456		0.337042	0.317538		0.101532	0.072011
	0.084226	0.05909		0.546389	0.451563		0.098626	0.120575
	0.061512	0.052448		0.43952	0.27605		0.107768	0.080159
	0.059758	0.036351		0.597345	0.335901		0.114724	0.171935
	0.068215	0.041275		0.773039	0.442671		0.091044	0.075399
