# Supplementary material for: Connexin 43 hemichannels regulate mitochondrial ATP generation, mobilization, and mitochondrial homeostasis against oxidative stress
Source: eLife. 2022 Nov 8;11:e82206. doi: 10.7554/eLife.82206 (PMC9642995; doi:10.7554/eLife.82206)
Supplement: Figure 4—source data 1. [file elife-82206-fig4-data1.xlsx]

## Sheet: pHluorin 
															pHluorin Change
Time(s)	Ctrl							CxKD								Ctrl	CxKD
0	1.05496	1.03237	0.966106	0.956352	1.02934	0.93237	0.923002	0.978647	0.998177	0.909724	1.00951	0.909605	0.981171			-0.30388	-0.34121
4.98	1.05791	1.00475	0.974036	1.04371	0.919582	0.874151	0.899324	1.02025	1.04666	0.972783	1.09423	1.02185	0.958719			-0.61671	-0.20974
9.98	1.03408	1.04746	1.08363	0.897658	0.908245	0.946944	0.833474	0.985163	0.991038	0.959618	1.05583	0.92806	0.932451			-0.64422	-0.32796
14.98	1.07806	0.907121	0.528789	0.871337	0.953998	0.779525	0.573664	0.942758	0.981149	0.885343	1.00206	0.84426	0.968384			-0.76854	-0.18573
19.98	0.731261	0.414049	0.488602	0.405003	0.402276	0.422861	0.217639	0.669032	0.827797	0.703077	0.799412	0.615246	0.818577			-0.7707	-0.38196
24.98	0.667452	0.245521	0.429482	0.307001	0.393342	0.340123	0.242961	0.629379	0.714725	0.718683	0.810258	0.624007	0.726316			-0.66206	-0.26462
29.98	0.686617	0.221162	0.404736	0.284963	0.387779	0.334456	0.237512	0.620292	0.750068	0.746616	0.835366	0.64668	0.718075			-0.69516
34.98	0.696121	0.229298	0.337942	0.304837	0.383286	0.355783	0.231464	0.658791	0.790265	0.672039	0.814271	0.618043	0.735379
39.98	0.739216	0.118238	0.49509	0.25248	0.393037	0.418401	0.27271	0.695582	0.770381	0.723494	0.794002	0.644346	0.747415
44.98	0.726027	0.370011	0.478715	0.421161	0.41535	0.414857	0.288057	0.696567	0.776164	0.775662	0.845336	0.642813	0.751324
49.99	0.77128	0.475019	0.880176	0.454611	0.466367	0.491659	0.325917	0.733851	0.836445	0.734493	0.845485	0.659181	0.736312
54.99	0.809924	0.912518	0.843625	0.845065	0.473425	0.455262	0.282576	0.748094	0.850525	0.778719	0.881536	0.707736	0.772418
59.99	0.838578	0.958883	0.909608	0.886857	0.411366	0.47096	0.284519	0.725407	0.770283	0.72753	0.832676	0.649367	0.725808
64.99	0.890117	0.866232	0.933346	0.836385	0.47015	0.488786	0.324391	0.728818	0.811721	0.760201	0.81354	0.674082	0.800685
69.99	0.876121	0.889164	0.918974	0.753099	0.517003	0.49545	0.306854	0.755598	0.839953	0.81797	0.905449	0.726961	0.79278
74.99	0.933269	0.954331	0.991524	0.868868	0.518875	0.526671	0.361676	0.737904	0.829779	0.803865	0.846583	0.669338	0.76583
79.99	0.886085	0.871021	1.03176	0.935893	0.493273	0.484918	0.333922	0.706231	0.79453	0.744795	0.839681	0.675776	0.761475
84.99	0.914453	0.814127	0.784465	0.74178	0.565596	0.500416	0.355781	0.708202	0.81433	0.743568	0.958723	0.686009	0.772191
90	1.00484	0.901147	0.891908	0.750614	0.565373	0.515098	0.333311	0.713435	0.841568	0.745195	0.843077	0.687577	0.811524
95	1.04202	0.851874	1.09657	0.777479	0.524136	0.463629	0.380102	0.734559	0.828495	0.820089	0.87215	0.701353	0.778174
100	1.06819	0.865359	0.846824	0.824961	0.61439	0.518754	0.367233	0.795489	0.892165	0.796356	0.872957	0.722544	0.838373
105	1.02121	0.848398	1.13274	0.684257	0.568763	0.480221	0.334618	0.734241	0.843343	0.773109	0.81765	0.686332	0.825759
110	0.962717	0.892842	1.04918	0.797781	0.555702	0.548708	0.393345	0.776391	0.853337	0.767712	0.893435	0.718596	0.860652
115	1.03078	0.897706	0.909371	0.718718	0.605379	0.539285	0.414307	0.701504	0.817563	0.749903	0.861576	0.619198	0.780089
120	1.00314	0.765175	0.847528	0.670571	0.632654	0.54752	0.397034	0.745226	0.800458	0.765741	0.869526	0.694491	0.814072
125	0.975016	0.776376	1.03945	0.58357	0.609893	0.485475	0.436744	0.757247	0.816246	0.838177	0.827611	0.691823	0.817218
130	1.00222	0.835331	1.04274	0.714875	0.600242	0.479142	0.35477	0.737437	0.853856	0.808206	0.874195	0.677355	0.811828
135	0.996415	0.832951	0.895497	0.793299	0.565326	0.528043	0.395514	0.699626	0.808148	0.747566	0.793009	0.688989	0.754522
140	0.987861	0.863586	0.956603	0.694008	0.597068	0.546667	0.384842	0.731375	0.824195	0.758199	0.841648	0.67694	0.78455
145	0.962194	0.92751	0.945054	0.748701	0.557143	0.54324	0.378735	0.740101	0.847194	0.777215	0.832963	0.70158	0.794301
150.01	1.0308	0.817908	0.891804	0.641561	0.609667	0.522277	0.38636	0.722318	0.8356	0.741815	0.834448	0.685157	0.804964
155.01	0.960357	0.770225	0.843581	0.700412	0.513809	0.431829	0.301319	0.781893	0.827323	0.838576	0.891074	0.681948	0.820972
160.01	0.97918	0.685951	0.80163	0.553598	0.502583	0.43479	0.302034	0.759058	0.8473	0.818801	0.86445	0.750912	0.812187
165.01	0.996284	0.649526	0.699272	0.580357	0.534021	0.410267	0.269273	0.807888	0.880784	0.802211	0.863772	0.722985	0.863405
170.01	0.98081	0.758297	0.656207	0.637061	0.528979	0.414111	0.274201	0.720007	0.81663	0.768847	0.81082	0.688066	0.79188
175.01	0.998494	0.702442	0.639604	0.462722	0.511804	0.416381	0.283425	0.799271	0.862341	0.799309	0.905327	0.769073	0.813877
180.01	0.999314	0.639453	0.796993	0.565191	0.497797	0.428847	0.26848	0.687834	0.818493	0.722685	0.772526	0.672232	0.78114
185.01	0.959809	0.796883	0.840323	0.68584	0.437385	0.415428	0.255205	0.702771	0.819925	0.777813	0.857818	0.69869	0.82532
190.01	0.975503	0.692042	0.71395	0.502645	0.430372	0.411651	0.322321	0.772779	0.856752	0.808863	0.877997	0.68661	0.787437
195.01	1.01137	0.590272	0.785758	0.542722	0.441896	0.349174	0.249219	0.759755	0.85761	0.777989	0.81469	0.726474	0.845204
200.01	0.966424	0.582093	0.842665	0.498735	0.459037	0.376348	0.256663	0.708515	0.791144	0.792478	0.803879	0.693656	0.801908
205.02	1.00477	0.710812	0.766276	0.52486	0.36785	0.392487	0.322595	0.724409	0.819241	0.751025	0.811158	0.67849	0.777081
210.02	0.981679	0.547985	0.770669	0.544894	0.453954	0.407448	0.271341	0.737194	0.805696	0.739976	0.83451	0.672135	0.817559
215.02	0.980314	0.6142	0.812306	0.562933	0.492883	0.405843	0.236219	0.742771	0.832298	0.807184	0.864537	0.734314	0.767615
220.02	1.00491	0.726803	0.812336	0.621811	0.471092	0.345224	0.260455	0.770197	0.886341	0.780544	0.873167	0.708898	0.815628
225.02	0.977594	0.602402	0.711099	0.622153	0.428906	0.391098	0.242688	0.758558	0.807386	0.759225	0.821738	0.677307	0.797424
230.02	0.94678	0.602253	0.612053	0.635156	0.470415	0.357063	0.274489	0.777901	0.845161	0.794051	0.855532	0.712305	0.810802
235.02	0.930335	0.545507	0.689113	0.552727	0.488667	0.377053	0.26614	0.766542	0.855663	0.79978	0.839953	0.694334	0.79628
240.02	0.960966	0.618406	0.903028	0.60642	0.377111	0.393127	0.282139	0.766045	0.886226	0.855564	0.889977	0.729197	0.784422
245.02	0.952869	0.649197	0.624485	0.57285	0.495916	0.451746	0.282378	0.767136	0.884592	0.835505	0.891896	0.73008	0.834586
250.02	0.921047	0.582214	0.706986	0.531367	0.490425	0.45324	0.26256	0.797168	0.887778	0.829195	0.874202	0.724466	0.827894
255.02	0.905547	0.58754	0.790214	0.472278	0.511658	0.413943	0.330987	0.686042	0.832048	0.769424	0.810897	0.694402	0.837495
260.03	0.908456	0.782447	1.14297	0.672219	0.518417	0.411465	0.264432	0.760031	0.876373	0.82779	0.841284	0.696602	0.784097
265.03	0.911323	0.742515	0.784227	0.514002	0.487701	0.393776	0.293451	0.727923	0.818381	0.756463	0.818778	0.712556	0.785837
270.03	0.893978	0.55616	0.660867	0.628335	0.548022	0.442024	0.303339	0.754508	0.830322	0.780904	0.825934	0.679486	0.789978
275.03	0.859017	0.873364	0.853157	0.433107	0.531516	0.403697	0.323162	0.707725	0.815278	0.734585	0.782909	0.6564	0.785829
280.03	0.900698	0.648395	0.564321	0.528802	0.547723	0.483062	0.338937	0.743463	0.835899	0.820401	0.792338	0.648998	0.784572
285.03	0.914274	0.590326	0.872735	0.547273	0.474252	0.442364	0.291631	0.73656	0.841244	0.806621	0.823422	0.651455	0.815738
290.03	0.899421	0.71234	0.732077	0.665915	0.437733	0.371109	0.286121	0.731412	0.830312	0.910049	0.80818	0.696726	0.776309
295.03	0.899237	0.732666	0.622603	0.523282				0.740807	0.815848	0.770738	0.783182	0.707799	0.756939
300.03	0.852943	0.507585	0.483381	0.428677				0.712525	0.821347	0.756167	0.800583	0.653195	0.785372
305.03	0.899014	0.521692	0.578883	0.492299				0.739825	0.818184	0.788795	0.783801	0.677506	0.755289
310.03	0.848037	0.774322	0.772108	0.638908				0.675687	0.762019	0.714607	0.753527	0.619947	0.756604
315.03	0.817075	0.670079	0.561352	0.467669				0.728802	0.818968	0.799858	0.810672	0.641855	0.783633
320.04	0.848198	0.570548	0.790463	0.481996				0.737918	0.818696	0.823273	0.845817	0.68476	0.773514
325.04	0.875097	0.734628	0.789838	0.555891				0.750897	0.85424	0.78362	0.818024	0.65256	0.786468
330.04	0.890384	0.740981	0.550501	0.700324				0.763448	0.840628	0.791378	0.80575	0.699878	0.784427
335.04	0.830121	0.684142	0.604867	0.507695				0.778009	0.832211	0.832353	0.869096	0.691876	0.847349
340.04	0.853963	0.719345	0.5592	0.488272				0.753362	0.864458	0.802802	0.84204	0.701191	0.803807
345.04	0.812749	0.61765	0.524906	0.449423				0.708994	0.825474	0.759963	0.816886	0.627581	0.744393
350.04	0.787363	0.585905	0.738658	0.485894				0.722053	0.834045	0.793513	0.851229	0.674719	0.769381
355.04	0.816538	0.559499	0.750138	0.63048				0.736414	0.804566	0.791569	0.775985	0.661824	0.7794
360.04	0.817712	0.623637	0.709712	0.515334				0.667047	0.78984	0.727394	0.768727	0.619955	0.7716
365.04	0.781335	0.62434	0.829106	0.467468				0.747572	0.811051	0.788468	0.845656	0.649081	0.765558
370.04	0.814496	0.592641	0.809125	0.454182				0.735441	0.821343	0.746739	0.795752	0.666245	0.754976
375.04	0.822428	0.68162	0.639531	0.343201				0.630039	0.777221	0.701901	0.759787	0.632178	0.765616
380.04	0.832632	0.533049	0.553545	0.508322				0.721652	0.837165	0.807786	0.824031	0.642407	0.747865
385.05	0.839307	0.544684	0.564721	0.498353				0.789153	0.825645	0.823946	0.823547	0.68443	0.798206
390.05	0.827179	0.532222	0.800641	0.563588				0.786231	0.844507	0.829746	0.862428	0.670954	0.747472
395.05	0.80991	0.595299	0.74012	0.519931				0.743064	0.819824	0.755493	0.799286	0.673264	0.78654
400.05	0.815005	0.68061	0.522482	0.440063				0.753677	0.83448	0.830318	0.799685	0.665263	0.773137
405.05	0.829771	0.546186	0.714494	0.519221				0.768519	0.839762	0.819396	0.826285	0.702188	0.753964
410.05	0.810549	0.565083	0.613221	0.409058				0.743939	0.824234	0.728498	0.807081	0.657285	0.794332
415.05	0.825432	0.481179	0.492261	0.445574				0.758514	0.861708	0.805466	0.835886	0.703229	0.793872
420.05	0.826366	0.482117	0.37809	0.371307				0.74466	0.816923	0.776407	0.789203	0.664082	0.789292
425.05	0.79188	0.472715	0.400818	0.381473				0.744035	0.825032	0.814475	0.785325	0.655571	0.787863
430.05	0.808963	0.510301	0.568196	0.43761				0.716957	0.799627	0.736652	0.801896	0.639665	0.794243
435.05	0.802263	0.540913	0.47317	0.468872				0.678881	0.753804	0.663686	0.712223	0.598693	0.789384
440.06	0.807617	0.566559	0.511563	0.459171				0.702441	0.850016	0.762192	0.789886	0.639216	0.779786
445.06	0.78052	0.503807	0.630036	0.414182				0.714013	0.800207	0.768001	0.781255	0.638259	0.75909
450.06	0.780344	0.739199	0.586118	0.440788				0.68541	0.785874	0.724147	0.743783	0.636266	0.796221
455.06	0.793256	0.634915	0.649458	0.490261				0.771965	0.860065	0.749492	0.780707	0.644366	0.803993
460.06	0.797431	0.757079	0.552825	0.480885				0.738514	0.805372	0.749723	0.751326	0.623414	0.741124
465.06	0.794065	0.740447	0.612068	0.473391				0.730562	0.859862	0.723799	0.796642	0.631004	0.748443
470.06	0.785403	0.800146	0.571068	0.483546				0.745664	0.78834	0.803037	0.819989	0.648907	0.790301
475.06	0.782632	0.780111	0.663501	0.575031				0.666904	0.823117	0.727734	0.792276	0.670895	0.75237
480.06	0.770814	0.564132	0.688347	0.467787				0.671666	0.792836	0.74122	0.812951	0.622915	0.759411
485.06	0.772031	0.720743	0.603664	0.488667				0.707579	0.840227	0.792586	0.810047	0.681882	0.762825
490.06	0.770045	0.793928	0.617654	0.598613				0.705859	0.840221	0.792386	0.78893	0.651811	0.802002
495.07	0.755238	0.752448	0.599125	0.469403				0.720903	0.818695	0.757655	0.756857	0.669496	0.756726
