# Supplementary material for: Connexin 43 hemichannels regulate mitochondrial ATP generation, mobilization, and mitochondrial homeostasis against oxidative stress
Source: eLife. 2022 Nov 8;11:e82206. doi: 10.7554/eLife.82206 (PMC9642995; doi:10.7554/eLife.82206)
Supplement: Figure 4—source data 2. [file elife-82206-fig4-data2.xlsx]

## Sheet: ATP5J2 pHluorin
Time(s)	Ctrl																	CxKD
0	1.0484	0.929888	0.917907	0.992251	1.09653	0.87851	1.03659	1.03186	1.06785	0.990819	1.0655	0.96588	1.18605	0.972239	0.976008	1.15909	0.864981	1.46284	0.91023	0.80163	0.971218	0.918431	1.03507	0.909078	0.915372	1.0105	0.86237	0.813307	0.793929	0.992686	0.922105	0.964793	0.864604	1.06362	1.25897	1.05225	0.932443
4.98	0.995476	1.11436	1.05033	1.07902	1.19283	0.918804	1.05	1.06982	0.983848	0.836142	0.729497	0.913958	1.0618	1.03425	1.03053	1.19625	0.910891	1.41475	0.873787	0.813577	1.01789	0.949886	0.9166	0.894665	0.982714	0.982067	0.846802	0.890842	0.81082	1.22142	0.905866	0.934373	0.852972	1.01225	1.14339	0.836893	0.960785
9.98	1.00299	0.996887	1.03576	1.03304	1.06475	0.82771	1.02043	1.36599	0.861056	1.02534	0.683785	0.891302	1.08074	1.03682	0.996876	1.2262	0.954399	1.48406	0.882083	0.851881	0.942238	0.85111	1.05317	0.916536	0.98606	0.983808	0.967813	0.949553	0.982912	1.05262	0.858644	0.986174	1.03507	0.70834	1.2045	0.900905	1.02108
14.98	0.974261	1.00671	0.964511	0.997897	1.13327	0.936047	1.09046	1.24901	1.09548	0.841046	0.73267	0.852653	1.05608	0.926522	1.08238	1.54004	0.846586	1.55708	0.902811	0.93392	1.09971	0.815118	1.20126	0.915379	0.969157	0.892054	1.13744	0.971973	0.799983	1.2404	1.01692	0.892351	0.867758	0.85754	1.04111	1.1005	1.10638
19.98	1.01283	0.983152	0.892023	1.0296	0.990839	0.856906	1.12813	1.08888	0.9076	0.827507	0.871395	0.946044	1.25144	1.09683	1.03891	1.4482	0.925554	1.55214	0.927726	0.848675	1.15136	0.880737	1.00927	0.875598	1.12279	1.00614	0.931036	1.01455	1.01702	1.21818	0.986645	0.96398	0.906831	1.00275	1.16324	1.01762	1.33051
24.98	1.05924	1.03625	1.0427	1.12258	1.21333	1.06586	1.38475	1.5265	1.08124	0.772434	0.710651	0.909507	0.776213	0.849986	1.06907	1.5844	1.06783	1.48544	0.977962	0.786048	1.06437	0.921673	0.915046	0.961533	1.11777	1.15887	0.965285	1.00652	0.925392	1.26709	0.835764	1.04178	1.46989	1.25105	1.13746	1.32652	0.897704
29.98	1.15531	1.08222	1.02427	1.20525	1.27899	0.884634	1.26582	1.27056	1.53997	0.953599	0.789486	1.01121	0.831368	1.43209	1.26097	1.37476	1.16545	1.76647	1.00917	1.01653	0.938003	0.979408	1.01259	0.986392	1.1717	1.06099	0.954232	1.0889	0.9121	1.28685	0.891887	0.925085	1.61451	1.14522	1.33983	1.0308	0.969848
34.98	1.11735	1.03667	1.13786	1.33844	1.12299	1.00429	1.11141	1.28115	1.06325	0.908519	1.20362	1.64166	0.895014	1.07636	1.56761	1.19126	1.53072	1.45827	0.991409	0.950429	1.1074	0.981105	1.05431	1.01832	1.12522	0.995024	1.09523	1.11684	0.832463	1.19768	0.993337	0.831394	1.63129	1.35132	1.19962	1.02617	1.06055
39.98	1.23187	1.1878	1.10705	1.183	1.17626	1.0096	1.18129	1.23842	1.1597	0.952515	1.23826	1.7042	0.878809	1.2156	1.5746	1.28092	1.22748	1.45512	0.927435	0.739758	1.15593	0.979845	1.20091	0.994479	1.26919	1.28862	0.968773	1.10418	0.942296	1.26294	0.916822	1.00279	1.11623	1.06185	1.12871	1.05873	1.03913
44.98	1.0826	0.982258	1.19661	1.22493	1.30749	1.15162	1.27204	1.24169	1.20772	1.25745	1.2018	1.66424	1.06726	1.10321	1.68854	1.3049	1.42006	1.32783	0.935797	0.952151	1.17376	0.882764	1.21545	0.950888	1.10879	0.954829	1.07235	1.19435	0.976152	1.06169	0.88544	1.16198	1.45789	1.02288	1.24386	1.18044	1.19971
49.99	1.08985	0.973357	1.06972	1.19904	1.0814	0.972397	1.63696	1.09979	1.06085	1.09492	1.25524	1.6187	0.970761	1.1574	1.47993	1.3247	1.23042	1.67463	0.929147	0.855067	0.954883	0.907587	1.2127	1.01516	0.996598	0.965255	0.950469	1.10754	0.939719	1.16185	1.01077	0.821298	0.776551	1.22216	1.22145	0.841527	1.05562
54.99	1.0822	1.1161	1.20483	1.16937	1.38622	1.1785	1.18892	1.38149	1.17096	1.04521	1.16801	1.85121	0.975339	1.21465	1.53588	1.35763	1.0678	1.62242	0.846018	0.922924	1.02181	0.806741	0.931786	1.0002	1.00031	0.990539	0.913999	1.07325	1.01339	1.02113	0.912448	1.14358	1.44008	1.16461	1.12255	0.99711	1.15766
59.99	1.10712	1.19659	1.24372	1.02198	1.2328	0.840012	1.07469	1.12954	1.23917	0.880606	1.14786	1.55791	0.993029	1.2165	1.37556	1.40023	1.05299	1.48195	0.921082	0.705624	0.956464	0.952166	1.35877	0.945833	1.08746	1.09162	1.00904	1.0644	0.917278	0.929614	0.902986	0.963519	0.856232	1.08588	1.22842	0.952341	0.989526
64.99	1.08471	1.1288	1.15623	1.19875	1.08	0.994198	1.29943	1.39396	1.26589	0.96521	1.21548	1.50953	0.958415	1.36096	1.68994	1.32665	1.12827	1.47676	0.919022	0.841081	0.941029	0.83985	1.02375	1.02746	1.06226	0.945018	1.03978	0.989789	0.913928	0.995993	0.832832	0.987439	1.16785	1.26634	1.02234	0.986915	1.13846
69.99	1.11413	1.12438	1.21423	1.19912	1.22873	0.875451	1.18535	1.56417	1.56467	0.865576	0.783206	0.973566	1.11258	0.987292	1.06957	1.72109	1.08006	1.46301	0.930603	0.743576	1.00831	0.911736	1.24504	0.916438	1.13132	0.939542	0.917581	1.00135	0.869301	1.13512	0.873347	0.92422	1.07869	1.26177	1.15098	0.839595	1.09441
74.99	1.01283	0.978365	1.01466	1.14687	1.22419	1.0014	1.46886	0.985468	1.22161	0.75707	0.764378	0.668369	0.757084	1.42454	1.17485	1.52915	1.20401	1.59359	0.835749	0.925134	0.974227	0.762861	1.27282	0.978848	0.984698	0.870626	0.941559	1.05611	0.840474	1.37057	0.774602	0.866903	0.75419	1.05822	1.24362	0.989694	0.921582
79.99	1.14375	1.05588	1.13205	1.00896	1.21925	0.936562	1.4093	1.04062	0.987173	0.706985	0.651979	0.795947	0.841335	0.999459	1.10828	1.36721	1.25608	1.46534	0.935202	0.802607	0.994704	0.834643	0.928364	0.881249	0.947427	1.0928	0.928949	0.973764	0.830454	1.14217	0.865881	1.01742	1.10807	0.870289	1.13962	0.926264	1.13599
84.99	1.13386	1.06504	1.14137	1.02665	1.19201	1.13838	1.16843	1.20477	1.25861	0.680603	0.683915	0.812313	0.803359	0.974447	1.24828	1.35813	1.02379	1.79094	0.867582	0.757864	0.913205	0.81556	0.848555	0.870375	1.06128	1.06031	0.861414	1.03852	0.842378	1.20484	0.90637	0.979602	0.881594	0.787004	1.18401	0.885276	1.01951
90	1.08779	0.958298	1.05592	1.14677	1.21863	0.976949	1.21037	1.38356	1.28471	0.750249	0.608259	0.939979	1.17741	1.0999	1.42925	1.32971	0.929184	1.48421	0.844567	0.729368	0.973863	0.82073	0.940591	1.06812	0.969251	0.92514	0.863117	0.999584	0.853258	1.04153	0.909001	0.88449	1.21035	0.764761	1.00415	0.920501	1.11283
95	1.10356	1.11918	1.04599	1.12143	1.18708	0.865047	1.38931	1.31247	0.85645	0.742404	0.696494	0.843606	0.773788	0.841124	1.09626	1.89846	1.09691	1.74669	0.808316	0.92352	1.10419	0.816436	0.992641	0.924768	0.977822	1.02716	0.879986	1.0009	0.838269	1.15912	0.846893	1.02899	1.18293	0.776843	1.20568	0.784041	1.16894
100	1.09304	1.004	1.16534	1.03509	1.07778	1.05935	1.20714	1.93098	1.53449	0.579744	0.74769	0.916233	0.795419	1.29129	1.00338	1.41817	1.07505	1.44018	0.86639	0.691001	0.974532	0.807568	0.919693	0.983353	1.00989	1.03895	0.796269	0.932805	0.839904	1.18374	0.795984	0.978945	0.859735	1.08571	1.09606	0.9029	1.18994
105	1.15728	1.10638	0.9889	1.16626	1.16064	1.01069	1.07698	0.96402	0.980942	0.647103	0.592892	0.976672	0.67043	1.54039	1.15549	1.45616	0.914825	1.51349	0.784772	0.822631	1.04423	0.845698	0.829999	0.858059	1.08624	0.931697	1.02175	0.94294	0.926325	1.08331	1.00063	0.897541	1.00578	1.10758	0.912497	0.867313	0.964639
110	1.06338	1.15543	1.0748	1.17222	1.30913	0.858536	1.08263	1.34791	1.15081	0.676499	0.71407	0.855828	0.778063	1.25167	1.01093	1.19881	0.925649	1.44863	0.834047	0.716001	0.954985	0.923867	1.0045	0.937465	1.0883	0.945678	1.00771	1.05424	0.797939	1.03216	0.820867	0.952931	0.958071	1.04064	1.17388	0.924361	0.945129
115	1.18665	1.1327	1.13754	1.18718	1.23657	0.850512	1.17364	1.34056	1.18949	1.10471	0.628473	0.877695	0.850077	1.41233	0.920063	1.25231	1.05774	1.48308	0.909086	0.954681	0.978594	0.760537	0.715559	0.974267	0.914429	0.889152	0.981433	1.02702	0.806744	1.11447	0.860911	0.982235	1.08628	0.802754	1.14871	1.02658	0.992577
120	1.01869	1.17697	1.09238	1.25202	1.13173	0.895699	1.1811	1.09773	1.06804	0.658423	0.733861	0.949362	0.790044	1.46389	0.917899	1.20145	0.812436	1.37119	0.860741	0.945049	1.01223	0.758645	0.971226	0.982458	1.00582	0.948247	1.08303	1.06657	1.08613	1.13478	0.884451	0.903011	1.3745	0.909397	1.10778	0.982216	0.995722
125	1.02004	0.995149	1.09973	1.13919	1.14414	0.994223	1.33881	1.37847	1.32014	0.688707	0.658674	0.752231	1.15685	1.14933	0.938919	1.44878	1.0242	1.40172	0.828402	0.748712	1.13681	0.846103	0.986092	0.887197	1.09486	0.901018	1.01717	1.08601	0.965314	1.23093	0.975702	1.04239	0.936643	0.710622	1.12383	0.764453	1.08441
130	1.03497	0.989678	1.20156	1.10674	1.15424	0.946257	1.4416	1.43943	1.7545	0.583671	0.712443	0.957882	0.669727	0.868899	0.926786	1.70693	0.860682	1.7784	0.80536	0.787337	0.969792	0.74955	0.8747	0.969647	1.06663	1.01877	0.956633	1.17719	0.955136	1.119	0.833162	0.882495	0.94698	1.03659	1.18708	0.885613	0.849302
135	1.0946	1.01272	1.06674	1.12683	1.22246	1.01209	1.29738	0.917302	1.26833	0.579618	0.519859	0.855702	0.686428	1.29171	0.78376	1.69346	0.87618	1.38382	0.807474	0.766369	0.98074	0.798412	1.00728	0.823494	1.02378	0.97419	0.930563	1.035	0.987702	1.14821	0.852417	0.993313	1.08191	0.901773	1.06128	0.877003	0.881095
140	1.12084	1.1585	1.15477	1.20595	1.20453	1.00226	1.32499	1.27392	1.06789	0.607057	0.581173	0.800745	0.89357	2.34113	0.931413	1.56259	0.84589	1.80148	0.787111	0.92147	0.838378	0.87532	1.00232	0.934703	1.04303	0.943832	0.839849	1.10985	0.834343	1.14518	0.926421	0.877759	0.97813	0.891098	0.980315	0.941077	0.855354
145	1.07627	1.26161	0.998562	1.15842	1.1517	0.805567	1.16037	1.51035	1.09638	0.643527	0.717424	0.711643	0.882077	0.817451	1.29262	1.18738	0.845306	1.40473	0.903452	0.931444	0.92618	0.835346	0.984079	0.871672	0.991788	0.955584	0.779665	1.01257	0.784618	0.984287	0.804388	0.8932	0.929222	1.17592	1.11623	0.847446	0.920375
150.01	1.18715	1.05875	1.3895	1.19951	1.28105	1.04098	1.25337	1.16212	0.888305	0.548772	0.58404	0.758233	0.590801	1.10979	0.942139	1.35387	0.711144	1.42531	0.796816	1.0549	1.07645	0.82119	0.887414	0.88497	1.06504	0.973928	0.828992	1.08251	0.81969	1.05868	0.81904	0.919126	0.949219	1.06735	1.23565	0.99738	0.985643
155.01	1.09231	0.990366	1.10516	1.02482	1.26935	0.869684	1.3288	1.24564	1.00442	0.652648	0.679928	0.687801	0.586607	0.859828	1.01422	1.5923	0.926832	1.49627	0.847304	0.861826	0.94902	0.772635	1.07008	0.906358	0.993114	1.0036	1.03055	0.936595	0.850022	0.980132	0.851133	0.947792	1.08201	1.06014	1.12573	1.02996	1.20261
160.01	1.14467	0.99313	1.04265	1.12198	1.23812	0.831874	1.47314	1.71879	1.33035	0.606011	0.629828	0.984266	0.819066	1.25919	1.37255	1.29098	0.879958	1.54107	0.818408	0.935541	0.968322	0.821934	0.864776	0.850748	0.9405	0.978157	0.795919	0.976837	0.887754	1.04412	0.892218	0.850029	0.875812	0.880162	1.15378	0.9211	0.830736
165.01	1.27545	1.15262	1.14856	1.12681	1.30312	0.965235	1.54295	1.74526	1.58547	0.549663	0.677576	0.706723	0.687925	0.894572	1.05749	1.09128	0.76133	1.59705	0.813749	0.806305	1.06549	0.871182	0.644225	0.868857	1.05971	0.949208	0.873022	1.02482	0.855824	1.1448	0.904196	0.90848	1.65842	1.01093	1.2864	0.931424	0.893468
170.01	1.12056	0.938221	1.02653	1.08799	1.17826	0.965245	1.36301	1.44964	1.1577	0.553044	0.647902	0.709977	0.697136	0.939804	1.11414	1.12425	0.893023	1.43756	0.865399	0.779497	1.02513	0.796532	1.0699	0.952866	1.06655	0.856113	1.04136	1.12189	0.84648	0.977081	0.749319	0.912671	1.05956	0.863133	1.1399	1.02786	0.91651
175.01	1.19751	1.07114	1.24967	1.16124	1.1566	1.01376	1.13369	1.15519	0.831314	0.554042	0.853434	1.01978	0.582064	1.06138	0.839015	1.46022	0.829816	1.45562	0.882949	0.738956	1.05289	0.838538	1.02815	0.886147	1.00096	0.891653	1.00987	1.04449	0.909894	1.20955	0.850531	0.944919	1.12926	1.01723	1.26428	0.816856	0.835619
180.01	1.11271	1.12306	0.96078	1.18438	1.09908	0.830796	1.19544	1.64459	1.03757	0.595272	0.623264	0.776544	0.84689	1.14624	0.932685	1.55331	0.755119	1.40762	0.951627	0.981801	1.04648	0.84623	0.976407	1.00043	1.01038	1.03528	0.954937	1.03567	0.899394	1.35269	0.798129	0.916473	1.29732	0.981683	1.09091	1.12019	1.04166
185.01	1.20444	1.24627	1.10788	1.08231	1.22245	0.899667	1.21737	1.21895	0.973875	0.672302	0.681366	0.655872	0.44685	1.43799	0.808135	1.45562	0.611166	1.45648	0.839476	0.715993	0.997573	0.808692	0.779587	0.952916	1.04857	0.96243	0.836679	1.05105	0.817833	1.02246	1.00174	0.770947	0.84372	0.796875	1.10071	0.99147	1.06699
190.01	1.1927	1.00188	1.15936	1.1441	1.23661	0.995379	1.33891	1.01012	1.03803	0.704256	0.549508	0.610832	0.442091	1.0836	0.802815	1.4107	0.59425	1.40698	0.819202	0.878874	1.07645	0.807774	0.888044	0.88307	1.12438	1.08271	1.1326	1.00729	0.926763	1.22506	0.791908	1.11633	0.923326	0.936294	1.02655	0.958925	0.976795
195.01	1.18563	1.14181	0.996422	1.10996	1.26825	0.853078	1.2676	1.29927	1.56944	0.603232	0.594629	0.771389	0.633723	1.33528	1.15323	1.13594	0.931337	1.68196	0.888498	0.846048	1.10786	0.799988	0.899857	0.927965	1.04544	0.783579	0.911251	1.02597	0.813612	0.997083	0.851625	1.00761	0.951516	1.0861	1.16666	0.943424	0.851424
200.01	1.17095	1.05425	0.990271	1.08137	1.04711	0.989975	1.33164	1.49573	0.925783	0.801981	0.728456	1.09762	2.24984	1.91053	0.77134	1.19128	0.771361	1.5589	0.826438	0.978024	0.965283	0.79484	0.910269	1.05196	1.00862	0.977362	1.0377	1.00884	0.923859	1.12573	1.0375	0.934518	0.784194	0.849965	1.05477	1.02522	0.959553
205.02	1.17381	1.29529	1.08944	0.989499	1.18178	0.941495	1.31988	1.00237	1.44336	0.663748	0.554419	0.867298	0.485107	1.12606	1.02465	0.966634	0.631199	1.33366	0.884317	0.852483	0.995447	0.814492	1.01782	0.86335	0.959308	1.01396	0.856084	0.970425	0.852857	1.09812	0.83107	0.920812	1.19467	0.866187	1.13662	1.02285	0.935701
210.02	1.11248	1.07427	1.09411	1.11529	1.3934	1.02043	1.18785	1.10963	0.937332	0.644475	0.450235	0.796102	0.365479	1.06522	0.941714	1.47898	0.598564	1.75331	0.89999	0.817404	1.03049	0.816743	0.877787	0.938488	1.02588	0.932081	0.857417	1.0532	0.942219	1.13061	0.787068	0.892396	1.39049	1.23748	1.10106	0.833653	0.990284
215.02	1.22166	1.0606	1.03629	1.05717	1.30227	0.901549	1.26816	1.58985	1.134	0.593634	0.528273	0.734479	0.466931	1.01573	0.939987	1.3285	0.785211	1.45188	0.817244	0.745514	0.895221	0.801413	0.763593	0.954692	0.983608	0.840091	0.953489	1.15717	0.848576	1.07746	0.952695	1.02222	0.926432	0.84461	0.970052	0.927045	1.01394
220.02	1.34681	0.97501	1.03368	1.09015	1.28548	0.808012	1.2788	1.42279	1.09986	0.655293	0.598446	1.79947	0.60026	1.59339	0.798287	1.78642	0.829123	1.53454	0.782471	0.744483	1.12991	0.875984	0.952616	1.01048	0.926038	0.842497	0.872289	1.0199	1.17663	1.09871	0.78053	0.903963	0.889106	1.00988	1.29447	0.929854	0.901592
225.02	1.1773	1.16113	1.03442	1.12613	1.18191	1.04004	1.1031	1.34502	1.398	0.579931	0.694811	1.0655	0.570386	1.21868	0.970057	1.49961	0.675538	1.3538	0.711504	0.843285	1.00329	0.862866	1.0669	0.802048	0.975598	0.976354	0.893076	1.1055	0.773571	1.0085	0.860398	0.884357	0.860303	1.58091	1.06895	0.89888	0.895075
230.02	1.15873	1.07565	1.07016	1.13051	1.2113	1.04077	1.14363	1.39833	0.985823	0.429068	0.398868	0.5396	0.391393	1.01312	0.702119	1.12184	0.72598	1.51385	0.830886	0.714992	1.043	0.789929	1.0627	0.961242	1.08122	0.936809	1.21249	0.994688	0.952772	1.05869	0.800347	1.01878	1.29919	0.933042	1.31122	0.967094	1.01098
235.02	1.1568	1.29967	1.0069	1.26699	1.22833	0.903981	1.16834	1.23285	1.14179	0.824993	0.679834	0.859327	0.882102	0.958625	0.869269	1.45781	0.737201	1.71025	0.804604	0.780963	0.876361	0.912528	0.761934	0.962379	1.03849	0.951482	1.04368	1.05547	1.09914	1.18672	0.788147	1.15777	0.915236	0.982128	1.14145	1.02708	1.14608
240.02	1.22884	1.26892	1.13227	1.19642	1.11556	0.909354	1.22884	1.21165	1.22914	0.600456	0.492696	0.634058	0.430697	1.39247	0.880763	1.27729	0.893924	1.46227	0.766574	0.894939	0.848103	0.845393	1.22859	0.982219	1.07244	0.889395	0.875362	1.16524	0.989834	0.962782	0.805449	1.12061	1.01366	1.02992	1.1591	1.0622	1.02376
245.02	1.15833	1.00637	1.1334	1.16583	1.15745	1.13034	1.19182	1.51143	1.26364	0.634352	0.695195	0.838842	0.557814	0.815915	0.969275	1.41048	0.839339	1.40635	0.916883	0.769914	1.07875	0.749047	0.997265	0.929003	1.00111	0.94761	0.869779	0.891464	1.00764	0.983355	0.814218	0.906021	1.1069	1.30261	1.11543	1.0692	0.963717
250.02	1.07614	1.16704	1.07457	1.12749	1.23199	0.97763	1.36528	1.24154	1.02848	0.636642	0.557689	1.02284	0.765576	0.968319	1.00775	1.08325	0.810029	1.38526	0.846617	0.676794	1.03926	0.800882	0.937813	0.940177	1.00974	0.88033	1.00276	0.907223	0.941496	0.951185	0.808954	0.862382	0.788263	0.842297	1.17308	0.89197	1.10536
255.02	1.21456	1.0644	0.980124	1.13906	1.14628	0.817066	1.40978	1.45843	1.43718	0.591032	0.696853	0.431796	0.466193	0.854961	0.911061	1.40375	0.793634	1.64888	0.794328	0.775654	0.916799	0.790191	1.12821	0.963342	1.04718	0.884484	0.9574	0.938913	0.859913	1.11134	0.788325	0.810645	0.95344	0.938421	1.1246	0.874224	0.82387
260.03	1.13501	1.2093	1.15814	1.12103	1.08249	0.958237	1.56232	1.36433	1.07378	0.422503	0.652673	0.488176	0.817275	0.932231	0.806539	1.34604	0.646166	1.81138	0.865507	0.884751	0.883277	0.854812	0.97457	0.91167	1.04904	0.981265	1.06668	0.967063	0.785646	1.04278	0.85384	0.860922	1.27705	0.984688	0.95311	0.967299	0.976413
265.03	1.17908	0.868063	1.13248	1.09732	1.18555	0.928236	1.16875	1.36643	1.5998	0.570101	0.473924	0.635024	0.66413	0.614031	0.931002	1.08035	0.765406	1.60749	0.853615	0.89047	1.29686	0.831579	0.903894	0.966118	1.09399	0.793294	0.892832	0.965676	0.852415	0.904299	0.858899	1.0138	0.925895	1.10109	1.20328	0.946044	0.873892
270.03	1.19096	1.11881	1.25526	1.2291	1.28778	0.996569	1.1427	1.47801	1.28673	0.398137	0.604897	0.552487	0.391117	0.878847	0.785255	1.3713	0.601265	1.7534	0.844315	0.82986	0.943264	0.798079	0.851991	0.895653	1.13742	0.890551	0.908746	0.983279	0.835527	1.07039	0.840318	0.924544	0.911457	1.1004	1.01117	1.04304	1.07913
275.03	1.24103	1.11774	1.12019	1.14915	1.59649	0.948415	1.33299	2.06485	1.19332	0.608111	0.481782	0.747808	0.52639	0.782218	0.888914	1.24925	0.587328	1.45365	0.817432	0.8565	0.923175	0.816887	0.929738	0.847495	0.878435	0.979428	0.924897	0.939588	1.07088	1.46911	0.836999	0.866823	1.09297	1.10362	1.08098	0.925741	0.970734
280.03	1.19991	1.07922	1.01268	1.12192	1.27206	0.890592	1.33704	1.21179	1.38608	0.650007	0.714987	1.16761	0.46538	0.956529	0.954943	1.19896	0.648109	1.50602	0.749589	0.905001	1.002	0.845403	0.814198	0.963258	0.875302	0.778051	1.09505	1.02506	0.911645	0.93263	0.866587	0.865194	0.985976	1.12996	1.18603	1.10013	0.865129
285.03	1.21702	1.3587	1.04622	1.13598	1.13908	1.0536	1.12604	1.35917	1.21149	0.466032	0.601417	0.651433	0.396353	0.739243	0.697289	1.32468	0.651341	1.3132	0.840096	0.799648	1.07283	0.782219	0.881409	0.958019	0.970944	0.909479	0.920306	1.08688	1.02869	1.03016	0.854328	0.951362	0.974178	0.866872	1.08995	1.05744	0.903752
290.03	1.06139	1.11501	1.11921	1.03502	1.15481	0.953359	1.15249	1.69299	1.0072	0.496299	0.521834	0.673081	0.527746	0.691106	0.885281	1.25919	0.639386	1.46163	0.777191	0.8541	1.12032	0.785582	0.892069	1.13495	1.06906	0.818564	1.07582	1.08155	0.866383	0.960841	0.908374	0.998146	0.979673	0.680067	1.08663	0.995074	0.949287
295.03	1.24943	1.13123	1.45953	1.03544	1.18911	1.07802	1.28863	1.53673	1.80654	0.697082	0.642812	0.730315	0.56456	0.972181	0.832819	1.1865	0.58545	1.43663	0.916652	0.841539	0.958461	0.733367	0.842798	0.896545	0.959258	1.03544	1.00461	1.00511	0.825349	1.09475	0.78414	1.097	0.865331	1.11027	1.08532	0.988975	1.0481
300.03	1.25757	0.91324	1.16888	1.21359	1.26906	0.952148	1.26825	1.4903	0.979276	0.38936	0.641338	0.817425	0.421111	0.801823				1.37328	0.900613	0.830566	1.09413	0.754216	0.969141	1.03798	1.08802	0.970968	0.965242	0.965663	0.888562	1.02292	0.937599	1.05495	0.919851	0.982757	1.07556	1.05463	1.0279
305.03	1.28172	1.08881	1.12429	1.15175	1.36939	0.937058	1.468	1.28567	1.3269	0.600763	0.59633	0.801971	0.667908	1.44302				1.51809	0.829507	0.77858	1.09163	0.855142	0.946922	0.923706	1.04183	0.958406	0.944636	0.919214	1.04702	1.13326	0.847846	0.940869	1.00341	0.778172	1.04254	0.980324	1.09842
310.03	1.22942	1.13119	1.1863	1.29276	1.23114	0.978706	1.16067	1.3498	1.34103	0.478141	0.449521	0.854794	0.310159	1.38701				1.33457	0.818273	0.768043	1.03339	0.836573	0.690234	0.897051	1.01346	1.00343	0.880168	0.821443	0.904002	0.948807	0.784638	0.931809	1.10153	0.994582	1.19811	1.05412	0.978028
315.03	1.16153	1.01168	1.12036	1.16461	1.28307	0.921575	1.32049	1.11776	1.3378	0.603155	0.576245	0.848828	0.81791	1.2322				1.68388	0.935938	0.855239	1.05119	0.757884	0.995526	0.817073	0.993835	0.952895	0.866651	1.0693	0.936504	1.05222	0.930945	0.88675	0.867943	1.21673	1.2545	0.924218	1.05414
320.04	1.14529	1.01569	1.23341	1.20196	1.3096	0.97232	1.13706	1.37731	1.17635	0.433031	0.561742	0.954693	0.454737	1.2418				1.55105	0.908663	0.762391	1.00227	0.835639	0.9068	0.898845	1.0512	0.888442	0.871291	0.965375	0.920082	0.98603	0.899895	0.922281	0.894669	0.864635	1.18006	1.07947	0.912826
325.04	1.26331	1.06461	1.18847	1.13629	1.1624	0.831322	1.35628	1.4199	0.983294	0.520384	0.586993	0.897622	0.55212	1.10264				1.37918	0.800443	0.933109	0.992603	0.769516	0.992062	0.98772	0.90148	0.786124	1.01166	1.05898	1.00863	1.05422	1.0185	0.873838	1.41663	0.817178	1.06506	1.01592	0.895796
330.04	1.07628	1.08223	1.14733	1.14185	1.23647	0.840794	1.23577	1.32977	1.39222	0.598961	0.597624	0.746762	0.387238	0.690734				1.34994	0.854355	0.759476	0.89829	0.744475	0.863281	0.95748	0.93638	0.884167	0.943587	1.08723	0.864038	1.18874	0.762789	0.9575	0.796761	0.963306	1.12866	0.885762	1.12197
335.04	1.2001	1.11051	1.1323	1.20698	1.03426	0.834044	1.38175	1.24312	1.18543	0.485503	0.5369	0.668307	0.567576	1.25879				1.41818	0.91884	0.829272	1.14331	0.834171	0.909146	0.867569	0.967457	0.970223	0.856148	1.01322	0.747717	0.955904	0.829055	0.89843	0.72385	0.889039	1.27654	0.97011	1.07207
340.04	1.14814	0.944594	1.20379	1.10017	1.06903	0.869245	1.36067	1.66502	0.862086	0.555533	0.461201	0.666653	0.691869	0.950033				1.72831	1.01612	0.809901	1.02186	0.92615	1.25593	0.938534	1.04582	1.09519	0.980102	1.03586	1.05692	0.994441	0.755632	0.938093	1.36135	0.770853	1.14408	0.833961	0.958051
345.04	1.24549	0.954932	1.14169	1.06339	1.08453	0.882925	1.1861	1.61401	1.07179	0.41799	0.586563	0.961109	0.481565	0.753538				1.64871	0.860131	0.822683	1.04897	0.837898	0.958616	0.917811	1.11464	1.0756	0.872254	1.00379	0.962581	0.946951	0.874019	1.09668	1.26772	1.17284	1.09353	1.02617	0.958534
350.04	1.27835	0.957424	1.30431	1.19622	1.12431	1.04173	1.50965	1.48729	1.19191	0.426481	0.57851	0.686117	0.478679	1.05771				1.45752	0.850054	0.893148	1.12429	0.7754	1.04022	0.957011	0.996844	0.917784	0.972273	1.11867	0.903558	1.13335	0.849303	1.0376	1.04598	1.02899	1.13141	1.08383	0.870979
355.04	1.17757	1.14259	1.00639	1.26218	1.21381	0.934002	1.12288	1.37325	1.18826	0.484923	0.614042	0.96853	0.528846	0.64568				1.61271	0.808811	0.755653	1.06395	0.78088	0.978881	0.987494	1.10545	1.00084	1.00411	1.06925	0.853283	0.996985	0.797978	0.976016	0.849264	1.15426	1.16854	0.871968	0.982034
360.04	1.07065	0.920856	1.21282	1.0732	1.14019	1.09556	1.01135	1.4804	1.23767	0.406382	0.618051	0.677864	0.643863	0.81789				1.56436	0.879635	0.950533	0.934096	0.904186	0.77381	0.896937	1.16003	0.985648	1.04991	0.957917	0.98067	0.973277	0.937282	0.981786	1.21361	0.811265	1.07045	1.02513	0.987741
365.04	1.12383	1.08826	1.27035	1.16996	1.31741	0.922097	1.08338	1.17436	0.772726	0.398259	0.674662	0.669221	0.566558	0.768792				1.45721	0.898058	0.847157	1.10579	0.821716	0.88066	0.899263	1.09132	0.902133	0.969882	0.931233	0.959736	1.1803	0.871267	0.954767	0.81858	1.13898	1.17221	0.935382	1.16078
370.04	1.16807	1.00178	1.24115	0.967056	1.25851	1.10389	1.35335	1.52765	1.06415	0.381209	0.606885	0.993861	0.316726	1.446				1.46778	0.880462	0.949428	1.02221	0.918857	0.752136	1.00368	1.0166	1.03435	1.06424	0.992718	0.883849	1.07134	0.94375	1.11322	1.11168	0.930179	1.21271	0.912695	0.936591
375.04	1.23928	1.07251	1.15133	1.18473	1.19928	0.796261	1.35312	1.47826	1.29125	0.583816	0.385325	0.987289	0.41206	0.982017				1.55751	0.869385	0.784178	1.12998	0.880477	0.910976	0.983897	0.996949	0.92136	1.06021	0.929195	0.891033	1.03278	0.813016	1.06805	0.987644	0.838011	1.0358	0.918747	0.956413
380.04	1.20748	0.982453	1.1707	0.978558	1.21338	0.904846	1.75054	1.57529	1.58707	0.425158	0.603599	0.991293	0.402944	1.04806				1.41731	0.885011	0.967446	1.07254	0.828746	0.87071	0.938031	0.83616	0.858778	0.769507	1.22962	0.904039	1.42533	0.748655	1.12942	1.41494	1.12164	1.02088	1.08981	1.04455
385.05	1.15336	1.03879	1.08482	1.07286	1.2176	1.10367	1.05353	1.49438	0.946319	0.550305	0.546829	0.879187	0.518848	0.89204				1.47682	0.867	0.850717	0.971303	0.870297	0.832673	0.907616	1.05646	0.910235	1.03331	1.04504	0.94873	1.09811	0.861677	1.05931	0.936686	1.09262	1.26619	0.981407	1.0057
390.05	1.10579	0.996084	1.05725	1.0975	1.31538	1.05149	1.15363	1.72755	1.53312	0.399787	0.419986	0.69462	0.556665	0.748686				1.68797	0.839483	0.899698	1.12216	0.809552	0.922794	0.916811	0.983245	0.841783	0.925948	1.19959	1.10679	1.13277	0.817291	0.898036	0.845316	1.27249	1.14707	1.01274	1.1849
395.05	1.2212	1.11495	1.20768	1.14697	1.17271	1.05388	1.36032	1.20583	1.32351	0.426504	0.67567	0.558281	0.251459	0.697034				1.47308	0.916114	0.963219	0.844863	0.794107	0.889534	0.975054	0.929679	0.82241	0.893675	1.01827	0.811334	0.949444	0.833007	1.09774	1.27662	0.877529	1.23185	1.04656	0.905194
400.05	1.17259	0.967475	1.2538	1.08566	1.33742	1.18239	0.983755	1.22734	1.11962	0.58784	0.625131	0.91603	0.471922	1.08595				1.65741	0.857647	0.848052	1.20426	0.887518	0.895051	0.978887	1.14108	0.835751	1.27295	0.984248	0.857517	1.03459	0.858911	1.12793	1.04236	1.02767	1.11123	0.907328	0.908699
405.05	1.14715	1.03604	1.34274	1.27395	1.30177	1.02519	1.38918	1.10147	1.01932	0.495183	0.680428	1.1964	0.494327	1.23262				1.55014	0.822358	0.786281	0.885656	0.781741	0.956452	0.970635	0.97952	0.897076	1.11523	0.963354	0.964475	1.21769	0.813009	1.05269	0.994285	0.751307	1.12279	0.941008	1.00088
410.05	1.16065	1.18518	1.07586	1.09106	1.24527	1.01173	1.29187	1.42431	1.12757	0.56443	0.568002	0.631906	0.538399	1.22865				1.57967	0.834034	0.868525	1.14671	0.782123	1.00586	0.918288	1.05194	1.02107	1.06904	0.991991	1.06132	1.10991	0.863886	0.915483	0.78193	1.3806	0.975693	0.996611	0.977515
415.05	1.21511	0.938113	1.15158	1.22866	1.21548	0.926814	1.31079	1.32122	0.962993	0.490198	0.594282	0.746347	0.536046	1.37417				1.5713	0.909901	0.936485	1.13193	0.900348	1.05296	0.983337	1.09328	1.07073	0.943118	0.974628	0.818149	0.826913	0.857462	0.979477	0.810368	0.896808	1.21005	0.943075	1.17215
420.05	1.17304	1.1972	1.22349	1.10016	1.11476	0.930996	1.52461	1.35004	1.13522	0.524068	0.458378	0.6985	0.30822	1.17549				1.64057	0.858825	0.879347	0.992101	0.817622	1.14911	0.865974	0.992157	0.821318	0.899265	1.03615	0.908226	0.941373	0.898285	1.00704	0.905078	1.19924	1.11879	0.957066	1.01185
425.05	1.1527	0.907785	1.10179	1.18164	1.11134	0.981804	1.4704	1.32319	1.09272	0.437555	0.460506	1.01014	0.418541	0.91131				1.38863	0.811414	0.788096	1.03795	0.868136	1.15793	1.02005	1.14201	0.987083	0.852589	0.952505	0.701332	0.877074	0.743433	0.97455	1.12399	0.914608	1.13645	0.855373	0.998176
430.05	1.12005	1.05839	1.2431	1.26298	1.23907	1.2311	1.3103	1.5155	1.2622	0.534581	0.463221	0.724101	0.43053	0.666646				1.67345	0.950512	0.874239	0.889295	0.850971	0.917784	0.911955	1.09242	1.1647	0.881067	1.04512	0.914752	0.943737	0.898376	1.03952	0.895426	1.062	1.12274	0.884469	1.23381
435.05	1.02588	1.01151	1.05765	1.005	1.31349	0.847544	1.16464	1.55397	1.17194	0.375248	0.627577	0.763803	0.661184	0.673819				1.56495	0.885465	0.834977	0.97136	0.865314	0.817825	0.929475	1.06197	0.939944	0.919056	1.02246	0.988427	1.0037	0.727265	1.0036	0.9392	1.43659	1.02609	0.974863	0.806322
440.06	1.09726	1.03794	1.15341	1.23836	1.12545	1.00214	1.33385	1.36061	1.1493	0.419081	0.668952	0.563501	0.329938	0.920767				1.43359	0.842302	0.850956	1.10465	0.884504	0.893786	1.02861	1.15542	0.915872	1.03586	0.963005	0.904235	1.15305	0.947868	0.937791	0.871395	1.00607	1.1773	1.06072	0.830721
445.06	1.12901	0.899906	0.92413	1.04729	1.1232	1.0021	1.10665	1.21228	1.24232	0.539576	0.547383	0.809613	0.728293	0.950836				1.44486	0.933764	1.06288	0.991791	0.898955	0.954214	0.987069	0.941002	0.953334	1.08396	1.09118	0.815495	1.15903	0.888393	0.95145	0.782123	0.947461	1.13606	1.06278	0.825674
450.06	1.1674	1.13073	1.25487	1.13267	1.17527	0.88352	1.25727	0.738837	1.23294	0.441391	0.480568	0.610522	0.758562	0.954189				1.4876	0.874616	0.947727	1.01851	0.897679	1.2976	1.0205	0.99357	0.903724	1.02678	1.09652	0.961333	1.21261	0.847303	0.909039	1.1479	0.842799	0.988153	0.997078	1.00343
455.06	1.26844	1.04958	1.16513	1.14408	1.31381	1.15735	1.39483	1.51543	1.13532	0.629031	0.497109	0.620014	0.423988	1.01029				1.57072	0.835631	0.902183	1.05621	0.814989	0.926084	0.939978	1.14298	0.818765	1.10912	1.12774	0.897826	0.984651	0.947683	0.908281	1.21937	0.823492	1.11147	0.870397	1.051
460.06	1.1971	1.14125	1.08196	1.19601	1.35744	1.12271	1.52523	1.65762	1.09789	0.574987	0.491812	0.89475	0.498254	0.877321				1.54715	0.902685	0.772125	0.942756	0.867321	1.22886	0.974172	1.10315	0.946328	1.15976	1.02256	0.97085	1.01616	0.739047	1.09908	0.930901	0.874664	1.0437	1.03304	0.938968
465.06	1.2469	1.23494	1.29757	1.20534	1.30294	0.905858	1.13359	2.11623	0.992642	0.390327	0.621222	0.743751	0.670506	1.65858				1.36877	0.934908	0.79125	0.960629	0.900595	1.02141	0.889053	0.958369	0.939036	0.910998	1.0025	0.901359	0.908921	0.772023	1.10226	0.967093	0.793431	1.20176	1.00795	1.07646
470.06	1.1033	1.1045	1.19676	1.20578	1.08916	1.11016	1.36535	1.84983	1.42562	0.475103	0.499987	0.490105	0.481183	0.936819				1.39742	0.831777	0.960203	1.08992	0.870944	0.986228	1.0493	1.22707	0.989746	1.11922	0.99252	0.84954	1.11916	0.913876	1.06059	1.05278	0.749592	1.18008	0.982951	1.14009
475.06	1.22076	1.10714	1.18814	1.10979	1.10417	0.885541	1.20686	1.21661	1.24623	0.596245	0.652802	0.561892	0.611535	0.97228				1.45524	0.949625	0.765096	0.919302	0.882409	1.20573	0.899116	1.14872	0.897849	0.920095	1.01678	1.12327	1.02775	0.916081	0.834016	0.942477	1.06077	1.00345	1.05012	0.987986
480.06	1.13015	1.01731	1.12446	1.07455	1.14543	0.985835	1.08467	1.36387	0.999549	0.433066	0.523491	0.773324	0.44697	0.990368				1.67033	0.867233	1.02455	1.12677	0.812729	1.00901	1.05278	1.07148	0.926069	1.12852	0.959316	0.830927	0.982629	0.881528	0.929586	0.81873	1.05191	1.20351	0.892313	0.890308
485.06	1.1911	1.05911	1.11753	1.22968	1.16586	0.845619	1.16928	1.33523	1.1154	0.357927	0.599834	0.664154	0.530424	1.00069				1.57942	0.91573	1.04048	0.917597	0.848219	0.826397	0.963935	0.978411	0.889846	1.05137	0.961158	1.03513	0.82943	0.794932	1.00127	0.711656	1.0239	1.19597	1.04184	0.998463
490.06	1.08613	1.03065	1.1786	1.16615	1.189	0.790982	1.11854	1.48945	1.16098	0.525663	0.52759	0.455387	0.451464	0.774153				1.50961	0.852218	0.915773	1.12932	0.806524	1.01835	0.912086	1.14245	1.1386	1.00059	0.99016	0.919242	1.12766	0.793864	1.03083	1.16576	0.997975	1.14467	1.04313	0.879888
495.07	1.05961	1.10582	1.01438	1.05771	1.16752	1.04128	1.43878	1.50949	0.924006	0.407463	0.426772	0.718074	0.58237	1.17476				1.15832	0.720746	0.634754	0.769038	0.727239	0.819595	0.771983	0.972482	0.800147	0.982849	0.943999	0.928656	0.786037	0.730149	0.76395	0.684618	0.842203	0.996888	0.833201	0.738335
ATP5J2-∆pHluorin				Representitive					Maximal amplitude
	Ctrl	CxKD			Time(s)	Ctrl	CxKD			Ctrl	CxKD
	0.231872	0.455116			0	1	1			0.188043	0.419654
	0.1878	-0.07257			4.98	1.13992	0.994474			0.341239	0.155985
	0.107055	-0.26024			9.98	0.779917	0.996441			0.390936	0.281019
	0.182996	0.155926			14.98	0.96548	0.976241			0.257975	0.41358
	0.176255	-0.02016			19.98	1.25507	0.944005			0.324423	0.16333
	0.009604	0.200913			24.98	0.898644	1.01535			0.383551	0.466655
	0.181291	-0.00552			29.98	0.821218	0.982455			0.697012	0.238406
	0.238416	0.269188			34.98	1.09402	1.14077			0.966955	0.268703
	0.159702	0.288624			39.98	2.32049	1.22473			0.827263	0.338457
	-0.02044	-0.03123			44.98	0.930321	1.09993			1.03469	0.379271
	-0.06824	0.104182			49.99	1.21783	0.935545			0.850823	0.300426
	0.128794	-0.0577			54.99	1.78029	1.19613			1.06499	0.403057
	0.123585	0.262938			59.99	0.891077	1.0599			1.76473	0.536478
	0.246409	-0.08318			64.99	1.2309	1.00784			1.52368	0.25571
	0.227483	0.002786			69.99	1.06854	0.984901			0.832819	0.345384
	-0.04749	0.116229			74.99	0.654387	0.955529			1.1865	0.782611
	0.238262	0.061853			79.99	1.8922	0.941856			0.58545	0.647871
	0.704201	0.128713			84.99	1.28278	0.913452			0.576135	0.32442
	-0.12119	0.058731			90	0.916685	1.09977			0.997157	0.338912
	0.215598	0.03913			95	1.56317	0.977192			1.15934	0.427487
	0.574599				100	1.00946	0.898616			0.647925
	0.280915				105	1.44142	0.98359			0.837754
					110	1.86061	0.876039			1.85582
					115	0.8551	0.848947			0.887569
					120	1.02565	0.858543
					125	0.955426	0.934388
					130	1.47866	1.0656
					135	0.898157	1.17812
					140	1.1642	0.961554
					145	0.919106	1.0553
					150.01	0.797816	0.979147
					155.01	1.13787	0.961806
					160.01	1.25233	0.923962
					165.01	1.10581	1.09442
					170.01	0.729833	0.972803
					175.01	0.68303	0.984851
					180.01	0.919585	0.925195
					185.01	0.75475	0.897386
					190.01	1.05205	0.960252
					195.01	0.913973	1.04451
					200.01	0.697543	1.02226
					205.02	0.970638	0.910621
					210.02	0.95985	0.92729
					215.02	0.64467	0.978043
					220.02	0.595485	0.888396
					225.02	0.895396	1.03394
					230.02	1.14847	0.967747
					235.02	1.00061	1.03944
					240.02	0.925983	1.03808
					245.02	0.721666	0.782163
					250.02	0.98104	0.965732
					255.02	0.954353	0.902406
					260.03	0.758629	0.894118
					265.03	1.38816	1.01044
					270.03	0.827189	1.04473
					275.03	2.21863	0.978586
					280.03	0.85665	0.938619
					285.03	1.00519	0.846141
					290.03	0.773381	0.99218
					295.03	0.862324	1.00068
					300.03	1.27644	0.914851
					305.03	0.789823	0.907129
					310.03	1.23323	0.974607
					315.03	1.07394	0.913843
					320.04	0.983237	0.903792
					325.04	0.823577	0.913635
					330.04	1.17737	0.819553
					335.04	0.854603	0.997262
					340.04	2.43531	1.08812
					345.04	0.961745	0.919776
					350.04	0.795743	0.866343
					355.04	0.647649	0.96716
					360.04	0.810253	1.03172
					365.04	0.942648	1.12205
					370.04	0.959675	1.09883
					375.04	0.698704	0.988433
					380.04	1.04594	0.874826
					385.05	1.19117	0.979824
					390.05	0.895737	1.04062
					395.05	0.939006	0.911989
					400.05	1.35232	0.987472
					405.05	0.770491	0.923941
					410.05	0.917916	0.993102
					415.05	1.53615	0.940961
					420.05	0.88541	0.938599
					425.05	1.52296	1.02536
					430.05	1.06095	0.984903
					435.05	1.16341	1.00028
					440.06	0.876383	1.14046
					445.06	0.909642	0.972751
					450.06	1.73407	1.0905
					455.06	0.732834	1.01284
					460.06	1.44901	0.983164
					465.06	0.923701	1.02188
					470.06	1.48049	0.971978
					475.06	0.822098	0.981778
					480.06	0.944431	1.11407
					485.06	1.04736	0.999839
					490.06	1.12095	1.09591
					495.07	1.72421	1.07078
