# Supplementary material for: Connexin 43 hemichannels regulate mitochondrial ATP generation, mobilization, and mitochondrial homeostasis against oxidative stress
Source: eLife. 2022 Nov 8;11:e82206. doi: 10.7554/eLife.82206 (PMC9642995; doi:10.7554/eLife.82206)
Supplement: Figure 5—figure supplement 1—source data 1. [file elife-82206-fig5-figsupp1-data1.xlsx]

## Sheet: OCR
OCR
Time (minutes)	Veh										IgG									CT									CBX
1.41145	46.9277	47.2426	46.6576	47.9577	49.2263	83.5062	73.935	62.1056	60.1558	47.8231	62.3079	47.2093	48.7642	57.0399	47.3264	63.0115	37.426	35.951	48.8287	46.6399	44.0727	43.3553	52.6941	40.7756	56.8972	74.8932	41.5003	36.0515	45.3511	45.499	42.6922	35.8051	54.6718	45.4061	46.3618	44.9888	48.3767	47.7528
5.94954	45.676	46.3242	44.8808	47.249	48.2093	78.6525	69.4131	61.0147	58.571	48.3361	60.2989	44.1748	45.6665	56.8462	49.171	62.4688	37.402	36.6698	45.9795	42.0599	44.2888	42.556	50.2754	38.563	51.6222	68.8139	39.3558	34.1101	43.722	45.9732	43.1064	39.0725	53.0187	42.1973	44.3839	43.7411	48.2669	45.4412
10.5823	117.41	108.8	45.8746	107.645	124.819	111.988	110.984	129.573	106.832	110.344	60.8059	98.5109	119.319	133.922	48.9135	144.69	106.079	95.8157	122.792	64.5942	85.2742	86.8038	115.355	93.8938	106.025	66.6566	108.2	96.1765	44.7788	46.0946	43.9338	40.305	52.882	43.1972	109.104	119.124	122.721	104.767
15.1264	111.564	102.318	44.7829	105.041	124.165	109.525	105.649	127.782	103.603	106.313	58.8771	91.6327	113.722	126.999	46.6966	135.794	100.152	88.1074	115.018	54.1653	78.2124	75.9218	114.931	94.7983	100.191	63.4676	104.958	97.0869	42.0958	44.2412	43.0114	35.796	49.6337	41.4816	104.165	112.805	117.987	97.9173
19.7558	34.6293	31.8777	40.8232	35.5211	38.4484	58.9283	55.2012	48.4563	43.3772	37.9941	57.1454	31.0141	33.8042	38.0787	43.4686	42.558	33.6824	27.5397	38.25	22.7521	27.278	23.9665	35.4325	29.4971	34.4181	59.9415	33.1937	28.8711	38.2152	42.0488	40.6612	33.0798	45.722	38.4841	31.4287	32.0643	32.0227	33.3496
24.2968	31.2822	28.8302	41.662	31.3254	36.4604	49.337	46.7731	43.1882	37.856	33.9284	52.8693	28.4958	30.7509	35.9735	40.2271	38.7685	30.6077	23.9581	29.9086	20.1	24.2791	21.37	31.9646	26.8338	30.4039	55.9001	28.0918	28.1916	36.3671	39.6444	38.047	31.642	43.3534	35.9692	29.1827	29.96	30.4721	29.6676
28.9173	61.1833	56.0216	50.2975	59.4143	80.95	59.2487	55.0934	77.1207	57.6213	57.3705	79.4992	49.969	65.8876	73.5845	58.0061	77.6719	24.8383	19.208	54.4416	31.7117	38.8609	40.334	62.7512	56.2114	63.9571	84.8676	47.661	51.5513	51.2371	53.5381	51.4669	44.646	60.5964	47.9818	53.3122	65.7043	70.295	56.4467
33.4602	55.3469	50.7375	45.6316	53.9464	71.9284	51.0565	48.8851	67.4157	51.5802	51.3386	70.2973	45.6761	60.3165	67.0923	51.2197	70.8324	21.6953	16.9108	47.0866	27.1404	33.0739	34.8119	55.7843	49.1913	55.3746	73.7681	41.4595	43.1181	46.3558	49.2861	45.018	39.4004	54.7304	42.8896	48.6075	59.6153	63.24	51.4802
38.0965	17.5974	17.4608	16.601	16.5882	17.3147	18.383	19.8336	17.5368	17.8561	18.2903	19.5495	17.4218	18.0711	19.9532	15.0249	22.5234	14.5102	15.7315	25.2518	11.0454	13.3881	12.4917	17.6328	14.3123	19.4338	24.3906	13.4335	30.4197	15.5315	15.3295	16.8978	14.2854	19.0067	15.7897	20.6789	18.653	15.3549	18.4823
42.6401	15.3388	16.369	14.6853	15.3124	16.6959	16.8196	24.1191	16.3989	16.1243	16.4864	18.5638	16.1533	16.0787	18.1657	14.1593	21.1184	13.448	12.7415	22.5578	10.8825	11.4593	12.5921	16.635	13.1548	17.1242	22.8027	10.0945	30.1337	14.3104	14.2721	11.8538	13.1911	17.9303	14.0785	15.1656	16.0719	14.7375	16.7332
47.182	15.4036	16.1115	14.4774	15.3795	17.319	16.3859	22.4723	17.5949	17.1445	16.2811	18.2842	16.4156	16.4345	18.1679	14.1862	21.5226	14.5123	12.8863	19.2017	11.1175	11.2649	12.1627	16.5997	13.7431	17.9682	23.4258	11.1893	24.4779	14.6739	14.9153	12.8038	13.5665	18.3038	13.7541	15.886	16.0937	15.0155	17.1568
	Veh										IgG									CT									CBX
RCR	3.39047	3.41303	1.12374	3.03046	3.2464	1.90041	2.01053	2.67401	2.46285	2.90424	1.06405	3.17633	3.5297	3.51697	1.12526	3.39984	3.14939	3.47918	3.21026	2.83904	3.12612	3.62188	3.25562	3.18315	3.0805	1.11203	3.25966	3.33123	1.17175	1.09622	1.08048	1.21842	1.1566	1.12247	3.47147	3.71516	3.8323	3.14149
UCR	1.7668	1.75739	1.23208	1.67265	2.10542	1.00544	0.998048	1.59155	1.32838	1.50998	1.39117	1.61117	1.9491	1.93243	1.33444	1.82508	0.737427	0.697465	1.42331	1.39379	1.42463	1.68293	1.771	1.90566	1.85824	1.41584	1.43585	1.78557	1.34075	1.27324	1.26575	1.34964	1.32533	1.2468	1.69629	2.04914	2.19516	1.69257
	Veh										IgG									CT									CBX
State 2	46.9277	47.2426	46.6576	47.9577	49.2263	83.5062	73.935	62.1056	60.1558	47.8231	62.3079	47.2093	48.7642	57.0399	47.3264	63.0115	37.426	35.951	48.8287	46.6399	44.0727	43.3553	52.6941	40.7756	56.8972	74.8932	41.5003	36.0515	45.3511	45.499	42.6922	35.8051	54.6718	45.4061	46.3618	44.9888	48.3767	47.7528
State 3	117.41	108.8	45.8746	107.645	124.819	111.988	110.984	129.573	106.832	110.344	60.8059	98.5109	119.319	133.922	48.9135	144.69	106.079	95.8157	122.792	64.5942	85.2742	86.8038	115.355	93.8938	106.025	66.6566	108.2	96.1765	44.7788	46.0946	43.9338	40.305	52.882	43.1972	109.104	119.124	122.721	104.767
State 4o	34.6293	31.8777	40.8232	35.5211	38.4484	58.9283	55.2012	48.4563	43.3772	37.9941	57.1454	31.0141	33.8042	38.0787	43.4686	42.558	33.6824	27.5397	38.25	22.7521	27.278	23.9665	35.4325	29.4971	34.4181	59.9415	33.1937	28.8711	38.2152	42.0488	40.6612	33.0798	45.722	38.4841	31.4287	32.0643	32.0227	33.3496
State 3u	61.1833	56.0216	50.2975	59.4143	80.95	59.2487	55.0934	77.1207	57.6213	57.3705	79.4992	49.969	65.8876	73.5845	58.0061	77.6719	24.8383	19.208	54.4416	31.7117	38.8609	40.334	62.7512	56.2114	63.9571	84.8676	47.661	51.5513	51.2371	53.5381	51.4669	44.646	60.5964	47.9818	53.3122	65.7043	70.295	56.4467
Complex I activity							Complex II activity
%	Veh	IgG	CT	CBX			%	Veh	IgG	CT	CBX
	81.7126	91.207	73.0415	32.86				41.9103	45.1725	45.2111	18.8738
	69.5716	76.205	69.3671	38.0177				46.3146	54.8908	39.1074	15.9848
	81.4215	73.7546	68.653	46.1924				42.8181	32.0485	48.2029	15.8202
	75.4613	67.4786	65.299	34.2794				34.4116	39.5003	31.6887	43.0713
	77.2917	60.9801	50.2646	34.5099
	70.8239	78.6231	50.8754	54.1256
	62.8863	84.124	49.4978	77.4748
		78.299	56.4029	65.8871
		65.4178		52.5381
