# Supplementary material for: Connexin 43 hemichannels regulate mitochondrial ATP generation, mobilization, and mitochondrial homeostasis against oxidative stress
Source: eLife. 2022 Nov 8;11:e82206. doi: 10.7554/eLife.82206 (PMC9642995; doi:10.7554/eLife.82206)
Supplement: Figure 5—source data 1. [file elife-82206-fig5-data1.xlsx]

## Sheet: Sheet 1
Time (minutes)	Veh									IgG										CT										CBX
1.41145	55.0065	68.141	63.3758	63.2317	66.2979	74.1606	66.8012	77.7214	51.7378	46.6122	52.7468	51.1313	54.7984	90.274	80.0264	56.1088	60.4283	46.5828	52.9861	42.6166	43.5479	46.7163	47.7109	43.8497	41.4708	37.2704	65.9699	63.6918	40.9308	40.6253	45.2834	42.7741	42.188	32.3475	38.4973	43.5224	42.7181	40.8621
5.94954	53.2805	64.7675	60.3039	60.1383	64.5748	73.8263	66.0914	76.8811	53.6979	45.7253	56.7949	52.989	48.3919	87.6881	72.2011	55.2965	62.4029	51.8444	59.9438	39.8247	40.1432	40.9933	43.9178	40.8192	39.395	35.7223	61.8194	59.0722	40.6757	37.199	40.8426	38.7344	38.4719	29.3989	36.2462	40.0723	39.3307	38.5855
10.5823	170.246	189.026	186.545	203.013	198.581	190.889	185.03	168.237	178.269	125.069	152.038	171.802	188.621	266.359	235.249	180.253	178.772	153.739	180.604	118.239	128.236	122.605	136.407	123.039	126.384	122.608	204.727	197.258	130.08	114.743	143.339	130.764	133.183	72.4159	120.995	129.623	135.701	134.633
15.1264	180.531	190.219	188.381	205.708	202.115	191.042	189.919	167.632	185.717	125.516	147.863	169.409	193.264	264.809	233.878	183.312	184.816	158.839	186.082	124.259	133.451	125.613	137.42	123.285	131.736	123.269	206.358	202.441	130.239	121.145	146.769	132.054	134.514	69.814	127.869	134.514	138.121	134.446
19.7558	47.8612	60.7405	53.3468	54.0363	60.8191	66.3906	69.2976	70.8248	48.6665	38.6298	47.4564	43.456	38.9249	73.1872	231.36	49.3638	52.5609	45.4861	55.3973	34.8009	35.1676	35.1001	36.7126	122.222	35.2844	31.3195	54.4305	52.9761	48.9928	29.2619	36.1309	34.6769	33.7371	63.146	31.9475	35.3965	36.118	34.2428
24.2968	47.4267	58.1628	53.4333	52.8822	56.7703	62.2944	67.7784	54.6535	44.4237	35.8507	46.3997	44.8808	37.1727	70.3766	226.687	50.8778	52.533	44.8336	53.4025	32.2303	33.3637	31.0416	35.1052	119.304	34.4582	30.778	52.5186	52.9468	44.9177	28.0868	37.0593	32.7456	32.5374	55.4263	32.1074	34.3507	36.1617	33.52
28.9173	150.828	164.071	153.475	173.984	173.746	143.134	157.013	125.867	159.271	97.4373	144.778	141.191	161.218	218.306	204.555	144.656	153.278	142.527	167.144	116.77	116.997	32.475	117.172	105.966	110.735	105.505	174.845	166.336	110.043	96.7372	116.137	100.38	119.543	43.7228	111.12	108.33	112.702	118.542
33.4602	147.378	160.212	146.787	174.703	171.769	134.222	151.209	114.771	147.984	87.1985	143.104	135.322	151.192	204.864	196.294	141.725	140.671	136.734	162.915	112.525	113.024	31.7972	111.149	99.8883	107.823	101.311	166.642	162.864	106.312	93.0424	113.239	95.8696	113.95	38.959	110.141	104.105	109.685	114.324
38.0965	22.368	38.1996	27.3569	26.1012	28.2314	31.1597	33.3855	38.3577	28.181	18.1163	26.8239	21.3172	15.7179	44.0678	36.8418	27.8715	31.8784	28.8903	34.2635	17.0555	18.5371	20.6571	21.5632	22.5916	17.5394	16.4532	28.7402	28.2841	23.7094	84.9834	18.8054	19.1009	18.2253	12.8791	16.738	18.8915	18.5543	17.8519
42.6401	20.8375	34.5587	26.1502	24.1416	28.3415	26.1715	28.7925	33.7573	19.9503	17.0566	23.8543	18.0873	10.8218	37.291	35.1416	23.2399	25.1178	19.0496	27.7847	14.9541	15.9242	16.8327	18.2525	19.675	16.7779	15.1462	26.7188	26.0707	20.2959	76.6405	18.2745	17.2638	15.8191	11.8664	16.1217	17.6235	17.238	16.9503
47.182	22.9419	35.4254	26.4563	25.2625	29.9883	26.2388	29.3181	34.6986	20.7808	17.6841	24.7201	18.7611	11.6138	37.3719	37.5627	21.6298	26.956	19.3763	26.7639	15.962	17.3477	14.8938	18.4292	20.782	17.4894	15.7046	27.5478	26.8539	20.459	69.5088	18.6849	17.7987	16.6176	11.9681	16.6451	18.198	18.1024	17.4592
	Veh									IgG										CT										CBX
RCR	3.55707	3.11203	3.49684	3.75698	3.26511	2.87525	2.67008	2.3754	3.66308	3.23764	3.20374	3.95348	4.84579	3.63942	1.01681	3.65152	3.40124	3.3799	3.26017	3.39758	3.64642	3.49301	3.71552	1.00669	3.58187	3.91476	3.76124	3.72352	2.65509	3.92125	3.96721	3.77094	3.94768	1.1468	3.7873	3.66204	3.75715	3.93171
UCR	3.15136	2.70118	2.87692	3.21977	2.85677	2.15594	2.26578	1.77716	3.27271	2.52234	3.05076	3.24906	4.14178	2.98285	0.884144	2.93041	2.91619	3.13341	3.01719	3.35538	3.32684	0.925212	3.1916	0.867	3.13835	3.36866	3.21227	3.13982	2.24611	3.30591	3.21434	2.89472	3.54337	0.692408	3.4782	3.06046	3.12038	3.46182
	Veh									IgG										CT										CBX
State 2	55.0065	68.141	63.3758	63.2317	66.2979	74.1606	66.8012	77.7214	51.7378	46.6122	52.7468	51.1313	54.7984	90.274	80.0264	56.1088	60.4283	46.5828	52.9861	42.6166	43.5479	46.7163	47.7109	43.8497	41.4708	37.2704	65.9699	63.6918	40.9308	40.6253	45.2834	42.7741	42.188	32.3475	38.4973	43.5224	42.7181	40.8621
State 3	170.246	189.026	186.545	203.013	198.581	190.889	185.03	168.237	178.269	125.069	152.038	171.802	188.621	266.359	235.249	180.253	178.772	153.739	180.604	118.239	128.236	122.605	136.407	123.039	126.384	122.608	204.727	197.258	130.08	114.743	143.339	130.764	133.183	72.4159	120.995	129.623	135.701	134.633
State 4o	47.8612	60.7405	53.3468	54.0363	60.8191	66.3906	69.2976	70.8248	48.6665	38.6298	47.4564	43.456	38.9249	73.1872	231.36	49.3638	52.5609	45.4861	55.3973	34.8009	35.1676	35.1001	36.7126	122.222	35.2844	31.3195	54.4305	52.9761	48.9928	29.2619	36.1309	34.6769	33.7371	63.146	31.9475	35.3965	36.118	34.2428
State 3u	150.828	164.071	153.475	173.984	173.746	143.134	157.013	125.867	159.271	97.4373	144.778	141.191	161.218	218.306	204.555	144.656	153.278	142.527	167.144	116.77	116.997	32.475	117.172	105.966	110.735	105.505	174.845	166.336	110.043	96.7372	116.137	100.38	119.543	43.7228	111.12	108.33	112.702	118.542
Complex I activity						Complex II activity
%	Veh	IgG	CT	CBX		%	Veh	IgG	CT	CBX
	96.8363	95.5226	83.8078	59.9393			96.0056	105.635	66.1277	48.4742
	89.2404	101.905	89.3353	51.8268			99.2188	109.619	78.5149	49.3322
	103.34	99.2467	80.9354	41.5538			112.151	64.7122	68.2933	43.1752
	106.226	95.882	73.2849	73.3807			92.6245	105.648	67.7084	63.8179
	104.357	85.5585	58.3156	86.4277				88.9864	62.3503	53.9969
			57.4419	81.7951
			52.4445	91.0052
