# Supplementary material for: Connexin 43 hemichannels regulate mitochondrial ATP generation, mobilization, and mitochondrial homeostasis against oxidative stress
Source: eLife. 2022 Nov 8;11:e82206. doi: 10.7554/eLife.82206 (PMC9642995; doi:10.7554/eLife.82206)
Supplement: Figure 6—figure supplement 1—source data 1. [file elife-82206-fig6-figsupp1-data1.xlsx]

## Sheet: ATP5J2 CT Ab treatment
	ATP5J2-pHluorin plot					ATP5J2-pHluorin Maximal amplitude
		Time(s)	IgG	Cx43-CT Ab			IgG	CT Ab
		0	1	1			0.408682	0.379017
		4.98	1.09554	0.855754			0.403614	0.339301
		9.98	0.831472	1.03722			0.249621	0.315631
		14.98	0.929885	1.05035			0.372027	0.407209
		19.98	0.987816	0.866322			0.357152	0.279257
		24.98	0.919279	0.922746			0.284569	0.263938
		29.98	0.973255	0.918388			0.387178	0.344453
		34.98	1.07842	0.883184			0.380293	0.300615
		39.98	0.902811	1.02251			0.360841	0.287324
		44.98	1.1078	0.91206
		49.99	1.00985	0.942553
		54.99	0.981098	1.0084
		59.99	0.923764	1.04349
		64.99	1.01121	0.859624
		69.99	1.11537	1.00702
		74.99	1.07597	0.878488
		79.99	1.06317	0.883457
		84.99	0.917225	1.09297
		90	0.901651	0.836057
		95	0.803387	1.02741
		100	1.19057	1.05336
		105	0.913098	0.92142
		110	0.913653	0.842485
		115	1.0136	0.962947
		120	0.871869	0.977496
		125	0.924685	0.940636
		130	0.805528	0.9962
		135	0.932361	1.02254
		140	0.907644	1.00497
		145	0.993421	1.03711
		150.01	0.975164	0.861401
		155.01	0.916821	1.05369
		160.01	0.891961	0.970258
		165.01	0.967918	0.979286
		170.01	1.01565	1.04125
		175.01	0.819718	0.904122
		180.01	0.899731	1.00366
		185.01	0.975583	0.940758
		190.01	0.973426	0.884776
		195.01	0.878402	0.879486
		200.01	0.853442	1.04794
		205.02	1.0778	1.0868
		210.02	0.975794	1.00715
		215.02	0.952809	1.07167
		220.02	0.917915	1.10868
		225.02	0.952982	1.00863
		230.02	0.920203	1.13571
		235.02	0.937091	0.933231
		240.02	1.03658	0.845631
		245.02	0.857512	0.767732
		250.02	0.911369	0.996816
		255.02	0.892739	1.09791
		260.03	0.839399	1.02148
		265.03	1.04145	0.877333
		270.03	0.994974	1.03857
		275.03	0.859473	0.824481
		280.03	1.0599	0.915499
		285.03	0.960342	0.931578
		290.03	1.04005	1.02967
		295.03	0.963807	1.20116
		300.03	0.90487	1.0409
		305.03	1.0521	1.02343
		310.03	0.813546	0.971171
		315.03	0.949689	1.09262
		320.04	0.923995	0.947342
		325.04	0.878272	1.05682
		330.04	0.877127	1.01311
		335.04	1.05762	1.05992
		340.04	0.884504	0.93394
		345.04	0.897509	1.09324
		350.04	0.959328	1.03748
		355.04	0.850231	0.878067
		360.04	1.13018	1.02275
		365.04	0.892232	0.922339
		370.04	0.94836	0.905594
		375.04	0.890784	0.886361
		380.04	0.769387	1.03017
		385.05	0.928991	1.0376
		390.05	0.827996	0.971363
		395.05	0.896949	0.949985
		400.05	1.25779	0.99288
		405.05	1.0321	1.08284
		410.05	1.03076	0.966768
		415.05	0.824768	1.26758
		420.05	0.82411	0.95559
		425.05	0.880994	0.88521
		430.05	0.807467	0.878042
		435.05	0.904555	1.03737
		440.06	0.830854	0.900851
		445.06	0.971745	0.926555
		450.06	0.822431	1.21083
		455.06	0.885761	1.06375
		460.06	1.11041	0.974712
		465.06	1.00683	0.942644
		470.06	1.10409	0.821717
		475.06	0.8197	1.03088
		480.06	0.941165	1.06411
		485.06	0.929653	0.814033
		490.06	1.05964	1.07665
		495.07	0.811434	0.903515
		500.066	0.890098	0.869371
