# Supplementary material for: Connexin 43 hemichannels regulate mitochondrial ATP generation, mobilization, and mitochondrial homeostasis against oxidative stress
Source: eLife. 2022 Nov 8;11:e82206. doi: 10.7554/eLife.82206 (PMC9642995; doi:10.7554/eLife.82206)
Supplement: Figure 6—source data 1. [file elife-82206-fig6-data1.xlsx]

## Sheet: Cx43-pHluorin signal
Cx43-pHluorin signal Average										mtCx43-pHluorin singnal
Time(s)	Cx43-pHluorin										Time(s)	mtCx43-pHluorin
0	0.983619	0.99894	1.01045	0.977834	0.9677	1.01999	1.02882	0.980897			0	0.99885
4.98	0.956619	0.97194	0.983445	0.950834	0.9407	0.99299	1.00182	0.953897			4.98	0.986454
9.98	0.937862	0.943866	0.960296	0.916166	0.962721	0.939388	0.975614	0.941945			9.98	0.987174
14.98	0.885895	0.92234	0.980596	0.896042	0.945229	0.956322	0.944389	0.890382			14.98	0.972181
19.98	0.890261	0.922668	0.932883	0.860232	0.912378	0.922129	0.956968	0.894702			19.98	1.00502
24.98	0.845159	0.829188	0.8624	0.942159	1.00253	0.860024	0.95992	0.923824			24.98	1.32045
29.98	0.791464	0.768708	0.845552	0.747757	0.790929	0.772337	0.7532	0.80572			29.98	1.22397
34.98	0.732894	0.766159	0.853017	0.75644	0.692729	0.72369	0.715388	0.747682			34.98	0.830085
39.98	0.715586	0.764372	0.812869	0.772375	0.738478	0.707733	0.742166	0.815288			39.98	0.900604
44.98	0.742946	0.758318	0.779679	0.76362	0.753089	0.728111	0.727216	0.814562			44.98	0.665347
49.99	0.737743	0.736595	0.805214	0.789302	0.742313	0.740658	0.755247	0.792			49.99	1.09382
54.99	0.734824	0.764868	0.824578	0.774992	0.769021	0.721718	0.797685	0.845842			54.99	0.930783
59.99	0.692079	0.77378	0.808464	0.730271	0.807894	0.734776	0.770938	0.879175			59.99	0.793694
64.99	0.728293	0.755216	0.778098	0.752858	0.755923	0.742227	0.802638	0.794255			64.99	0.918352
69.99	0.710803	0.779594	0.798818	0.796706	0.811998	0.756024	0.811062	0.867145			69.99	0.980671
74.99	0.752059	0.768615	0.795168	0.802775	0.804425	0.744076	0.79271	0.8214			74.99	0.893183
79.99	0.754985	0.779456	0.802359	0.777986	0.840565	0.74817	0.800642	0.821945			79.99	0.901767
84.99	0.758483	0.778009	0.777533	0.786081	0.844425	0.737232	0.81827	0.906121			84.99	0.899277
90	0.720203	0.751387	0.85149	0.779028	0.795369	0.733176	0.823037	0.904161			90	1.32123
95	0.770274	0.726667	0.789777	0.79214	0.851024	0.760984	0.798908	0.831871			95	0.992614
100	0.720918	0.777931	0.804667	0.791064	0.813259	0.717349	0.809266	0.912647			100	0.938363
105	0.759427	0.762606	0.811659	0.83259	0.80317	0.782786	0.830793	0.920914			105	0.857076
110	0.730484	0.765282	0.809334	0.794619	0.802725	0.769258	0.81462	0.926701			110	0.930074
115	0.720723	0.758084	0.7715	0.788017	0.855111	0.767574	0.825953	0.880896			115	1.15365
120	0.775474	0.729856	0.796839	0.775451	0.846896	0.783539	0.840692	0.901882			120	1.1309
125	0.747253	0.784483	0.814356	0.806434	0.837864	0.77639	0.815425	0.935087			125	1.12657
130	0.755978	0.752895	0.785467	0.836608	0.866315	0.799905	0.827988	0.890694			130	1.00592
135	0.750096	0.760865	0.831665	0.809338	0.864405	0.771195	0.830818	0.867156			135	1.38007
140	0.753005	0.762234	0.78745	0.779666	0.847834	0.773285	0.827941	0.862558			140	1.18113
145	0.772753	0.75006	0.801938	0.854764	0.873742	0.747579	0.832672	0.908881			145	0.886996
150.01	0.795105	0.760913	0.78668	0.818032	0.845739	0.759224	0.810047	0.898749			150.01	1.04221
155.01	0.770618	0.757655	0.806027	0.83259	0.827691	0.77819	0.827883	0.896614			155.01	0.756641
160.01	0.743499	0.75851	0.78651	0.847607	0.853048	0.749292	0.811808	0.902785			160.01	1.13175
165.01	0.760304	0.76627	0.779417	0.843975	0.824417	0.765863	0.828983	0.838734			165.01	1.13108
170.01	0.776947	0.759922	0.83238	0.853418	0.863905	0.73406	0.822714	0.880987			170.01	0.962459
175.01	0.690516	0.784165	0.802105	0.824068	0.859621	0.765744	0.853098	0.911021			175.01	1.06469
180.01	0.731914	0.757186	0.806692	0.82535	0.824202	0.755954	0.844317	0.877593			180.01	1.33501
185.01	0.786814	0.758943	0.79898	0.831522	0.811662	0.753585	0.819155	0.888837			185.01	0.794968
190.01	0.708321	0.776492	0.802981	0.779621	0.848645	0.760772	0.846332	0.899872			190.01	0.953017
195.01	0.762085	0.758414	0.80252	0.856098	0.79078	0.795716	0.806703	0.865908			195.01	1.24325
200.01	0.732924	0.735412	0.807363	0.83856	0.870938	0.779773	0.860543	0.871164			200.01	0.983101
205.02	0.737151	0.761483	0.77235	0.809953	0.802685	0.767484	0.837742	0.907194			205.02	0.871437
210.02	0.741364	0.766411	0.756155	0.838868	0.837844	0.741084	0.848079	0.857891			210.02	1.02635
215.02	0.75946	0.750066	0.776888	0.828349	0.860011	0.753388	0.838004	0.894171			215.02	0.68916
220.02	0.79113	0.772192	0.801846	0.84216	0.846767	0.78445	0.832503	0.886377			220.02	0.972056
225.02	0.768122	0.777979	0.79575	0.833669	0.826572	0.736086	0.851065	0.895022			225.02	0.929711
230.02	0.733473	0.760679	0.780077	0.856721	0.841976	0.7702	0.856544	0.913957			230.02	1.05371
235.02	0.775417	0.749228	0.769244	0.875333	0.843975	0.758421	0.834993	0.874725			235.02	0.985899
240.02	0.735284	0.744436	0.783845	0.814685	0.796454	0.73555	0.854059	0.875361			240.02	0.739138
245.02	0.753197	0.761817	0.778847	0.812907	0.866537	0.733834	0.860216	0.88539			245.02	1.13948
250.02	0.779211	0.76557	0.79193	0.832042	0.864123	0.781281	0.858386	0.897131			250.02	1.1723
255.02	0.753555	0.745697	0.781745	0.867591	0.840002	0.743949	0.861214	0.895261			255.02	0.707471
260.03	0.727102	0.74033	0.7739	0.872038	0.8408	0.745413	0.860861	0.879781			260.03	0.867685
265.03	0.756329	0.764817	0.7667	0.852131	0.838116	0.747286	0.837529	0.915433			265.03	1.16174
270.03	0.767603	0.760603	0.775493	0.870909	0.858838	0.730506	0.866008	0.914007			270.03	1.19354
275.03	0.789339	0.7207	0.752033	0.830496	0.80401	0.719553	0.8005	0.881379			275.03	0.902139
280.03	0.753674	0.747339	0.778847	0.838177	0.82227	0.724162	0.821577	0.91513			280.03	1.21551
285.03	0.757481	0.755561	0.776625	0.821277	0.81927	0.754896	0.819918	0.862158			285.03	0.855806
290.03	0.774358	0.767859	0.770045	0.851195	0.853461	0.737301	0.838388	0.899183			290.03	1.12001
295.03	0.761373	0.773375	0.76734	0.867224	0.815223	0.769853	0.820934	0.946931			295.03	0.955282
300.03	0.772213	0.757168	0.780466	0.855362	0.810919	0.740844	0.843786	0.902894			300.03	0.835457
305.03	0.777532	0.766462	0.785859	0.879395	0.823978	0.790138	0.823861	0.942801			305.03	0.94822
310.03	0.792348	0.749459	0.775375	0.875544	0.869443	0.765246	0.84382	0.903719			310.03	0.894989
315.03	0.765464	0.750832	0.757662	0.880991	0.877239	0.761042	0.852574	0.934509			315.03	1.00405
320.04	0.809149	0.775549	0.775787	0.862959	0.835588	0.782327	0.849495	0.935868			320.04	1.10697
325.04	0.77464	0.753369	0.760195	0.826589	0.831079	0.755081	0.836666	0.955709			325.04	0.739886
330.04	0.813499	0.770321	0.801875	0.889838	0.828339	0.760938	0.860255	0.964946			330.04	0.997224
335.04	0.838155	0.800654	0.763433	0.925348	0.836893	0.764846	0.878761	0.914321			335.04	1.16122
340.04	0.782253	0.779228	0.765905	0.854779	0.859959	0.778909	0.83581	0.969052			340.04	1.06351
345.04	0.842037	0.763751	0.764969	0.924406	0.820582	0.737179	0.858205	0.925158			345.04	1.2334
350.04	0.830393	0.779889	0.802477	0.877098	0.838195	0.807956	0.830118	0.977435			350.04	0.905605
355.04	0.795817	0.762877	0.765674	0.891977	0.826883	0.75823	0.852274	0.935804			355.04	1.23933
360.04	0.808746	0.781057	0.794255	0.911078	0.856055	0.772801	0.809675	0.971759			360.04	1.17025
365.04	0.801123	0.790087	0.773857	0.914124	0.87205	0.785189	0.841932	1.02295			365.04	0.875869
370.04	0.803115	0.80902	0.787144	0.893692	0.818981	0.767478	0.832033	0.908778			370.04	1.0912
375.04	0.825991	0.808513	0.775726	0.912602	0.832712	0.793898	0.855864	0.958033			375.04	1.11937
380.04	0.799819	0.795816	0.766239	0.919782	0.833263	0.769841	0.844322	1.00814			380.04	0.821572
385.05	0.809113	0.797429	0.799714	0.87241	0.858776	0.758427	0.825554	0.949124			385.05	1.34593
390.05	0.792411	0.790225	0.794857	0.920349	0.848385	0.775926	0.816364	0.966542			390.05	1.13695
395.05	0.78549	0.785297	0.777285	0.898073	0.889774	0.768554	0.850706	0.961135			395.05	1.07956
400.05	0.818315	0.788681	0.778838	0.852664	0.83651	0.769177	0.839202	0.954014			400.05	0.634057
405.05	0.790806	0.804095	0.779068	0.895578	0.859875	0.785905	0.850923	0.964176			405.05	1.13886
410.05	0.812863	0.777	0.796536	0.87178	0.888259	0.783855	0.813207	0.935307			410.05	1.01354
415.05	0.805694	0.788291	0.751137	0.871975	0.794833	0.783855	0.821535	0.937153			415.05	0.758915
420.05	0.82332	0.806225	0.794978	0.875934	0.839132	0.766826	0.837422	0.986586			420.05	0.976612
425.05	0.803321	0.802101	0.766372	0.922832	0.890011	0.790129	0.807014	0.976976			425.05	1.09767
430.05	0.827834	0.793312	0.800959	0.853305	0.876216	0.768226	0.857205	0.938754			430.05	1.29791
435.05	0.840886	0.806909	0.781757	0.923077	0.869245	0.795585	0.838359	0.944961			435.05	0.779507
440.06	0.870126	0.814209	0.805476	0.903634	0.852094	0.778785	0.865462	1.00289			440.06	0.948284
445.06	0.813982	0.813612	0.759725	0.916688	0.862181	0.792576	0.855696	0.96051			445.06	0.928194
450.06	0.811887	0.799492	0.774635	0.91333	0.841427	0.789981	0.837962	0.953283			450.06	1.05952
455.06	0.821665	0.820029	0.797732	0.86738	0.855373	0.80216	0.827305	1.01326			455.06	1.08394
460.06	0.796558	0.800117	0.775957	0.924042	0.870372	0.796806	0.851141	0.962058			460.06	0.975002
465.06	0.867945	0.81951	0.800749	0.919505	0.896673	0.761796	0.854605	0.974361			465.06	0.966391
470.06	0.788684	0.798624	0.81726	0.88925	0.821961	0.807051	0.847034	0.926034			470.06	1.03131
475.06	0.819841	0.799645	0.788265	0.931542	0.854308	0.812519	0.846374	0.97058			475.06	0.971913
480.06	0.799329	0.803516	0.786761	0.862181	0.840496	0.775709	0.846589	0.952827			480.06	0.810956
485.06	0.845586	0.803789	0.799083	0.885438	0.825038	0.813424	0.844473	0.996845			485.06	0.994201
490.06	0.811976	0.811672	0.804384	0.917862	0.857123	0.774042	0.85459	0.982424			490.06	0.911608
495.07	0.839502	0.813846	0.754614	0.94267	0.84843	0.794098	0.835091	0.948263			495.07	0.789517
