# Supplementary material for: Connexin 43 hemichannels regulate mitochondrial ATP generation, mobilization, and mitochondrial homeostasis against oxidative stress
Source: eLife. 2022 Nov 8;11:e82206. doi: 10.7554/eLife.82206 (PMC9642995; doi:10.7554/eLife.82206)
Supplement: Figure 6—source data 2. [file elife-82206-fig6-data2.xlsx]

## Sheet: CT Ab treatment
mtCx43-pHluorin plot					mtCx43-pHluorin Maximal amplitude
	Time(s)	IgG	CT Ab			IgG	CT Ab
	0	1	1			0.281027	0.141614
	4.98	1.01974	1.03378			0.25222	0.120757
	9.98	1.12174	0.979748			0.226788	0.089233
	14.98	0.984457	0.985632			0.176228	0.088631
	19.98	0.964157	0.996256			0.307729	0.266719
	24.98	1.046	0.948608			0.270695	0.265253
	29.98	1.09992	1.0241			0.264288	0.240011
	34.98	0.987561	1.0014			0.200773	0.23812
	39.98	0.97207	0.990878			0.320261	0.192142
	44.98	0.962571	0.978846			0.268024	0.164742
	49.99	0.897625	1.02128			0.24226	0.144385
	54.99	0.982547	1.0214
	59.99	1.12088	1.05606
	64.99	1.07176	0.99202
	69.99	0.844614	1.03283
	74.99	0.949315	1.03942
	79.99	1.00994	1.02513
	84.99	1.00598	1.04257
	90	1.14371	1.06695
	95	1.10232	0.985432
	100	0.940309	1.05601
	105	1.05913	1.08457
	110	1.02676	1.00083
	115	1.03435	1.09006
	120	0.938723	1.03526
	125	1.02708	1.02545
	130	0.953894	1.02286
	135	1.05241	1.11012
	140	1.2158	1.03285
	145	1.02223	1.06252
	150.01	1.00733	1.026
	155.01	0.971548	1.03374
	160.01	1.02246	0.985255
	165.01	0.984938	0.970675
	170.01	1.06135	0.999026
	175.01	1.0325	1.00906
	180.01	1.08506	1.05531
	185.01	0.968517	1.02465
	190.01	1.05734	0.985538
	195.01	1.01478	1.00137
	200.01	1.07296	1.04061
	205.02	1.0254	1.02376
	210.02	1.09895	1.0127
	215.02	1.09374	1.009
	220.02	0.992302	1.03603
	225.02	0.903084	0.97219
	230.02	1.21081	0.988787
	235.02	0.97559	0.996632
	240.02	0.960991	1.00257
	245.02	1.03777	1.01316
	250.02	0.993117	1.0023
	255.02	0.94512	0.962887
	260.03	0.971988	1.01012
	265.03	0.967185	1.01924
	270.03	1.1302	0.995912
	275.03	0.967607	0.976675
	280.03	1.05351	1.03259
	285.03	1.00889	0.942115
	290.03	1.09374	0.987776
	295.03	0.971844	0.974568
	300.03	0.989363	0.984518
	305.03	1.26006	1.00712
	310.03	1.11558	1.01243
	315.03	1.31532	1.04443
	320.04	0.961534	0.962816
	325.04	1.11147	0.963783
	330.04	1.20053	1.00483
	335.04	1.07091	1.05652
	340.04	1.03684	0.960148
	345.04	0.906603	0.95428
	350.04	1.03706	0.982782
	355.04	0.985484	0.983114
	360.04	1.08159	1.03409
	365.04	1.01687	1.01801
	370.04	0.925947	1.01733
	375.04	0.993636	1.01561
	380.04	1.0001	1.02857
	385.05	1.03239	1.03221
	390.05	1.19644	1.05293
	395.05	0.967587	1.04425
	400.05	1.00308	0.974747
	405.05	0.970375	1.06338
	410.05	1.13531	1.04509
	415.05	1.02128	0.985709
	420.05	0.90855	0.972021
	425.05	1.0931	1.03765
	430.05	1.146	0.99979
	435.05	0.975339	1.034
	440.06	1.02871	0.992911
	445.06	0.96162	0.980404
	450.06	1.05274	1.05309
	455.06	0.954282	0.96881
	460.06	0.936651	0.99108
	465.06	1.13742	1.11184
	470.06	1.04103	1.0686
	475.06	1.17679	1.04833
	480.06	1.01071	0.985494
	485.06	1.05561	0.975908
	490.06	1.04554	1.01098
	495.07	0.891232	1.00512
	500.066	1.15552	0.99149
