# Supplementary material for: Connexin 43 hemichannels regulate mitochondrial ATP generation, mobilization, and mitochondrial homeostasis against oxidative stress
Source: eLife. 2022 Nov 8;11:e82206. doi: 10.7554/eLife.82206 (PMC9642995; doi:10.7554/eLife.82206)
Supplement: Figure 8—source data 1. [file elife-82206-fig8-data1.xlsx]

## Sheet: Sheet1
DCF				Co-localization
	Csf1+/+	Csf1+/-			Csf1+/+	Csf1+/-
	25.35	37.552			0.69	0.741
	14.275	33.76			0.648	0.792
	17.844	51.725			0.58	0.721
	10.218	50.718
	20.16	44.646
	11.89	33.405
	14.064	34.49
	13.452	33.026
	15.41	41.204
